# Supplementary material for: Comparative analysis of sequencing technologies for single-cell transcriptomics
Source: Genome Biol. 2019 Apr 9;20:70. doi: 10.1186/s13059-019-1676-5 (PMC6454680; doi:10.1186/s13059-019-1676-5)
Supplement: Supplementary file 5 — Table S3. Single-cell library statistics computed from randomly downsampled 1 million paired-end sequencing reads for mESCs performed using SMARTer and Smart-seq2 protocols and sequenced across HiSeq2500 and BGISEQ-500 platforms. (CSV 48 kb) [file 13059_2019_1676_MOESM5_ESM.csv]

	num_processed	num_mapped	percent_mapped	global_fl_mode	robust_fl_mode	detection_limit	accuracy	detection_limit_ERCC	accuracy_ERCC	detection_limit_SIRV	accuracy_SIRV	ERCC_content	SIRV_content	n_genes
ERR1901834	1000000	783634	78.3634	115	115	76.12179351441135	0.5000112337802831	216.71693497584144	0.7241989612863396	17.621950197779654	0.5621324636079593	7696.8380799999995	79236.05313679307	9320.0
ERR1901830	1000000	769716	76.9716	104	104	111.92677254257964	0.6133561442004454	388.7383520172695	0.7426012230896969	21.256851588678995	0.7420980875791664	4708.56133	88986.59530257742	9831.0
ERR1901832	1000000	754231	75.4231	123	123	71.15301649910303	0.6322027292009244	135.419149992443	0.8133722623231906	16.762762652475175	0.7368418210502299	5991.87806	97973.38191435614	10246.0
ERR1901835	1000000	807078	80.70779999999998	131	131	71.03031370690194	0.6825346066039105	203.11322494517358	0.9269878695372398	17.864057734769677	0.7137885027950271	11098.300469999998	114818.48480221751	8057.0
ERR1901833	1000000	778529	77.8529	135	135	62.82474391745533	0.628298023681259	212.02559661300887	0.7868303706430948	10.37879981139028	0.7340462299364998	6125.448340000001	74315.65773283188	9938.0
ERR1901831	1000000	796962	79.69619999999998	117	117	91.23512574546388	0.6185488750013858	313.4557284323971	0.7351514698513605	22.598372975665875	0.7455585675823777	5162.86303	103384.91312584702	8763.0
ERR1901836	1000000	766590	76.65899999999999	110	110	86.56958699088598	0.6330614884627018	357.4867542124309	0.8314409948909083	14.226163120874878	0.696857212694819	4516.53569	59417.383580518064	9682.0
ERR1901839	1000000	792345	79.2345	125	125	62.70164749132575	0.6006712072640977	146.30163797762538	0.7003405098276676	6.495234551721336	0.6731061116068505	7760.4969	81051.20518000345	9520.0
ERR1901840	1000000	822335	82.2335	114	114	75.7220638902164	0.734386165921896	198.73646443055955	0.8287645681854939	15.81489951236266	0.8605984953543212	10924.472430000002	112472.69212142941	8277.0
ERR1901838	1000000	748698	74.8698	124	124	102.32368919189942	0.3667557973702739	252.07737134213397	0.7984799777564189	28.06305207846876	0.3725120472328885	4964.87244	48588.32581087065	10377.0
ERR1901837	1000000	597821	59.78210000000001	102	102	54.89235356605485	0.7388998003010318	143.77033664429658	0.8684325614166065	5.8168475910275195	0.8055907571085729	46078.64166	548238.5191366913	8051.0
ERR1901845	1000000	673813	67.3813	130	130	75.57732768632128	0.5188001940433522	132.87678884737352	0.7579468562270751	22.474597638781585	0.5441518141046414	6236.49135	58692.81906943152	10826.0
ERR1901848	1000000	726480	72.648	103	103	75.85061909362773	0.6854695944896999	264.1076236556101	0.74576745005376	7.022180494011732	0.8344080330635267	9350.615890000001	90399.89336953478	9563.0
ERR1901841	1000000	802080	80.208	113	113	80.18752433310453	0.6389565621382245	257.9921183736821	0.8293013221949838	15.742654178648854	0.7252593378287611	6446.27449	70426.88405633513	9518.0
ERR1901844	1000000	701297	70.1297	104	104	66.82909138773469	0.7420350347948625	287.36444101698993	0.847334009896335	3.7611870030990557	0.8579524133689557	9037.03456	86325.29608606966	10047.0
ERR1901842	111713	75085	67.21241037300942	130	130	196.6117354675543	0.456204265613301	387.9445723679334	0.743458371105872	75.71783564505976	0.5500333923999359	8261.2533	81130.3787004329	7138.0
ERR1901846	1000000	778045	77.8045	103	103	75.88803529762257	0.6366902909879566	222.09983872036486	0.8749570809413798	15.81489951236268	0.6676927572761119	7366.35902	73563.69600322373	9177.0
ERR1901843	1000000	759478	75.9478	109	109	86.84060777954534	0.6237352303008733	603.4678510933089	0.7902798031440971	10.2715252581034	0.6697053039727846	7097.20275	77690.15321364676	9300.0
ERR1901847	1000000	564294	56.4294	114	114	82.04432241729391	0.681327241322188	615.3046302049374	0.8274156788535767	5.8168475910275435	0.7268889857329747	24527.82101	225435.82492302338	9798.0
ERR1901849	1000000	510065	51.0065	97	105	66.85346899923894	0.7334099657921535	294.7275746449038	0.8956322645836406	6.376545297451401	0.7952665625729258	42620.35458	487726.991531656	8695.0
ERR1901850	1000000	830090	83.009	113	113	66.79444286907197	0.6349628212918378	148.14237344324326	0.7860216435735501	13.5497385962973	0.7429132707884787	9499.43001	102427.80854676489	8574.0
ERR1901852	1000000	558690	55.869	97	111	51.686880201526684	0.6269700407804154	168.61933046329878	0.7352513352204987	5.861546685272349	0.7609736138145293	36259.110140000004	457663.0963780425	8839.0
ERR1901855	1000000	704826	70.48259999999998	98	100	71.2768208654249	0.5365809424172895	226.6166715036896	0.8419351274968806	5.257476395514236	0.5563502389685689	11109.53006	122266.45150045969	9576.0
ERR1901858	1000000	693975	69.39750000000001	121	121	85.4243629631803	0.6354368114197199	182.51721779375941	0.6767754125320816	22.474597638781635	0.860405293914019	9194.321479999999	98010.86312555028	10589.0
ERR1901859	1000000	642512	64.2512	115	115	99.77995172381782	0.6755510059293727	345.4928274017212	0.7499717903112383	20.241502556882825	0.819621468913148	6165.499540000001	64550.965629452134	11355.0
ERR1901854	88561	39292	44.367159359085825	104	104	176.8608735109522	0.3951345316606975	340.40875817355476	0.8574379786948952	58.48473452003648	0.4038678271510685	32879.977	465722.5759794431	5082.0
ERR1901853	1280	790	61.71875	121	121	10319261.232061485	0.09685381578835278	inf	-inf	1.6361522432468432e+58	0.08674061629510546	4494.367	29556.800077301683	557.0
ERR1901857	765639	470091	61.39851810056698	139	139	157.84333463368986	0.47894454986383683	340.40875817355476	0.8346419346621194	68.91910197324637	0.49439665536563465	3529.3655200000003	33829.78239669385	11776.0
ERR1901851	1000000	833394	83.3394	131	131	58.725650876771326	0.6895561999022882	202.4122768605403	0.7308105390982548	6.37654529745138	0.8169074922400464	7140.064080000001	74546.82474653663	9053.0
ERR1901860	1000000	605288	60.5288	93	111	80.5998130893016	0.7033359677608428	194.4943452669206	0.8005864902281049	17.621950197779665	0.8253153005838068	15236.77891	129019.46463800155	10988.0
ERR1901856	1000000	759434	75.94340000000003	111	111	66.82970020563182	0.6673433250527006	330.04644663348233	0.7046315424817617	2.2574263042603344	0.857350943897667	8395.04426	91737.75890947688	9274.0
ERR1901861	1000000	734058	73.4058	111	111	80.98953158012318	0.6387463394071526	435.08882556209386	0.716911465697461	12.306947574637126	0.7189781613912676	14455.69743	139209.25875551644	8711.0
ERR1901863	1000000	826828	82.6828	109	109	91.40104552316008	0.6641693978022217	572.9936018431694	0.7950784503646746	14.33069258124553	0.7799269900804202	7458.6408200000005	77557.72449446488	8742.0
ERR1901862	1000000	823820	82.382	115	115	55.450799761216935	0.7119557913715917	212.02559661300887	0.8141233068067513	2.632701251123858	0.8635642958593767	9577.46435	100366.21568612177	7854.0
ERR1901865	1000000	568608	56.8608	111	111	66.88208736269411	0.7517786857923042	143.46790594035082	0.8865897455782737	11.079886687247726	0.8232072452062056	20521.250229999998	184989.59563852288	10001.0
ERR1901866	1000000	927537	92.7537	105	105	55.06278092131513	0.734165183944285	181.51515803155735	0.7887468445248598	3.0165278052211013	0.8346857200368245	88450.31880000001	858456.8161979712	2779.0
ERR1901869	1000000	801548	80.15480000000002	98	113	81.99867647776442	0.529762812700269	436.68716302204126	0.7599613803860834	11.866731841127669	0.5971427108322322	8788.581498000001	102532.2143653872	8354.0
ERR1901874	1000000	748753	74.8753	112	112	71.21967385464292	0.6991218449302476	254.3503383175285	0.766266300594879	10.9443013192854	0.8328205467506578	10154.787199999999	106816.55709356998	9061.0
ERR1901872	1000000	716230	71.623	100	100	38.33204522820409	0.5462256784808099	68.61552638448396	0.6088323682191333	3.5960871895420605	0.6277480852471103	77756.64694	830211.294891587	3845.0
ERR1901871	1000000	608291	60.8291	100	100	76.09390153677155	0.5768358752261437	202.41227457642964	0.651544155578853	15.90026870498393	0.710351959706014	6793.68922	73422.54397647685	11672.0
ERR1901864	1000000	666531	66.6531	95	103	76.136640408661	0.6692825302518012	485.3119698736155	0.7345111724107991	4.345812037629738	0.7929679752182113	12849.04582	140991.38301509924	10054.0
ERR1901870	1000000	819969	81.9969	109	109	71.02512866562458	0.6283020124206599	246.3540133939361	0.7630786999923098	9.37223361015799	0.7846472003202285	10525.21934	94526.54085722574	8841.0
ERR1901867	1000000	816821	81.6821	110	110	55.17545871807058	0.5415274593095468	187.80193391587324	0.9023344461542074	11.259436416968295	0.5163110941176301	9720.833321	110797.10862570118	8322.0
ERR1901868	1000000	798842	79.8842	98	127	40.137157840290115	0.6927433089465967	104.30007032111651	0.7641593293938254	1.6797134482980247	0.7704786420729656	12611.18952	119604.62265442796	8255.0
ERR1901873	1000000	705368	70.5368	104	104	54.94162639189796	0.7257211715007746	250.33122933577272	0.7916275414958225	8.637636868927745	0.8043623950753668	14744.197969999997	129111.71947526827	9253.0
ERR1901875	1000000	843402	84.3402	101	101	81.02892726344531	0.6482973497510146	591.1333253539149	0.8722642491054475	6.937575267480412	0.7374702759941508	6456.8656900000005	76539.07758069328	9003.0
ERR1901878	1000000	592566	59.25660000000001	109	109	58.63037385122842	0.6517763927521444	168.61933049116942	0.8538718682893319	5.8168475910275435	0.6550415533867459	38018.147300000004	395628.2654413038	8354.0
ERR1901877	1000000	783773	78.3773	104	104	75.97305942201342	0.7035162918942329	290.78554317376813	0.7658871872019384	7.022180494011713	0.8255943841173592	12297.11271	93173.54053975109	8645.0
ERR1901879	1000000	682082	68.20819999999999	119	119	66.85878625737385	0.7305697753021536	302.37638885338146	0.839619402136886	7.546744681246669	0.8372726924266378	7880.19168	84056.52859965025	10544.0
ERR1901876	1000000	686457	68.6457	146	146	103.54054728741326	0.6019610170301346	290.78554317376813	0.6962547575268809	26.187741736555033	0.7197744569302733	5358.96811	59646.103275416266	10956.0
ERR1901880	1000000	907233	90.7233	96	105	37.14257634149301	0.6255730029487977	128.03810637561054	0.8431828721819563	0.25413833208959985	0.6162406742079536	84530.00484000001	870821.5109425369	2531.0
ERR1901882	1000000	800455	80.0455	113	113	75.52823628623172	0.6761197491236215	190.38084445941686	0.7693526468358342	18.16464523183666	0.8043333063636222	8428.56075	77735.22312321294	8924.0
ERR1901884	1000000	640952	64.09519999999999	95	119	45.41149339368789	0.6993558840752242	185.43152861105085	0.7337485201808086	1.6174538231397249	0.7980101383002516	34200.06336	336366.70164573414	7851.0
ERR1901881	1000000	669975	66.9975	104	104	51.95125839813235	0.4998379252743976	158.4828518174187	0.8736365950458078	7.49654211600935	0.4578101867988624	7603.04471	68680.4980036646	11012.0
ERR1901885	1000000	727699	72.76989999999998	105	105	92.5373250766095	0.5035521088816651	800.119765345842	0.6824461465676037	7.546744681246706	0.5398980970685116	12380.93461	133597.59960525733	8975.0
ERR1901883	1000000	816960	81.696	102	102	62.73867909088694	0.41178083041130037	182.51721779375956	0.6658806807000305	2.4777448368030957	0.42645628801034907	40482.12009	437692.37722630386	4459.0
ERR1901889	1000000	832432	83.2432	112	112	96.86188588080203	0.5706068336335657	307.81809108689384	0.8391585138253848	17.62195019777971	0.7112066038913543	8395.618289999999	95695.59269061673	8668.0
ERR1901887	1000000	569935	56.9935	96	103	48.789598397863344	0.714984098402726	87.01205734042625	0.715095285628575	7.022180494011722	0.8641307721394182	24786.264779999998	238583.51384824267	9509.0
ERR1901886	1000000	867076	86.7076	113	113	96.73825366910013	0.59633084303209	340.40875817355476	0.8789599900694153	21.806999468141107	0.74965428986595	8683.17238	89631.71295058275	7999.0
ERR1901888	1000000	722083	72.20830000000002	108	108	85.99933301105696	0.7319050303310402	378.29663816085616	0.8446873034363102	14.282740006748583	0.8199791072368303	9784.62426	88116.68093015725	9797.0
ERR1901890	1000000	903677	90.3677	103	103	62.67293783320921	0.6633261049059577	338.83403933932817	0.7468004171524907	4.028772474914802	0.7805657738198208	21846.991814	260258.94894389863	5492.0
ERR1901891	1000000	653938	65.3938	97	100	55.32072107885738	0.75342859024618	177.71851947054986	0.9126302136357503	5.861546685272357	0.8218513286375674	24654.575769999996	283550.44568485074	7570.0
ERR1901893	1000000	628284	62.8284	103	103	71.21818217217086	0.6496184732589193	270.43382934499783	0.8440983035908778	6.376545297451397	0.7745431858075473	7768.4204199999995	76601.99177938426	11867.0
ERR1901892	1000000	755895	75.5895	105	105	66.82415285192427	0.6250523545711741	163.6266659311505	0.6886017277416805	15.742654178648854	0.7727445725489835	7094.6495700000005	74375.67052185949	9376.0
ERR1901895	1000000	632759	63.27589999999999	91	100	66.88145596971462	0.654777395672169	300.37722061326986	0.8601847470980123	1.7791447940691707	0.7150038189786939	30615.613899999997	338056.05049164116	8144.0
ERR1901896	1000000	687564	68.7564	106	106	55.03045126194371	0.683761582407757	260.48817790624514	0.840232451004731	1.6797134482980407	0.730971852413862	10862.56761	111529.12268332244	9904.0
ERR1901894	1000000	704611	70.4611	99	100	55.317598378496434	0.6621875486803586	155.303035728667	0.7439270653111093	8.149663707537231	0.753277003029045	9730.95965	100347.91417898223	9850.0
ERR1901897	1000000	677452	67.74520000000001	123	123	45.15296574201934	0.6309774549674917	152.73208336407615	0.6743515448768213	4.028772474914798	0.7414373184981562	11899.016619999999	117784.90280646014	10156.0
ERR1901898	1000000	752763	75.27629999999998	108	108	55.42168050631606	0.7014603836178346	242.69439048157383	0.7390265949078612	4.6543953225424515	0.8288700268423442	7905.010630000001	74849.77392176747	9682.0
ERR1901900	1000000	711544	71.1544	120	120	54.326316968350504	0.479442132646935	205.63909032619424	0.7737643131606676	2.4777448368031023	0.47732156282324967	7782.571509999999	74303.88242300304	10741.0
ERR1901901	1000000	819744	81.9744	119	119	76.14180603305311	0.6151940827875871	321.5928142845791	0.8026441087589238	5.8168475910275195	0.6530572710048521	7526.648386	74812.09577813202	8914.0
ERR1901903	1000000	741098	74.1098	131	131	85.8021200427365	0.6008713464549589	217.11695207653597	0.7564953894653357	25.134250392736043	0.647008865711436	9484.79193	83801.59082313381	9416.0
ERR1901904	1000000	633492	63.3492	104	104	58.75533723477828	0.5368757274606684	185.43152863455876	0.7345915184387964	4.749974540724799	0.5616956363809159	33014.72404	300801.6222840684	7441.0
ERR1901902	602803	465496	77.22191163613981	132	132	139.47114616433652	0.6755714655187168	548.0982694843872	0.8304159778925735	23.927667360017082	0.7950972518079477	5012.1135300000005	77287.31568811958	8515.0
ERR1901899	1000000	758228	75.8228	100	100	66.86236284090485	0.6521936335630903	161.75917232942862	0.7650310333654646	11.079886687247642	0.7236191134747985	8012.105099999999	77251.96287145394	9787.0
ERR1901906	1000000	852556	85.2556	105	105	55.44547726302279	0.6707350386374743	163.6266659311505	0.7419293603170195	5.861546685272353	0.8116321895804914	11198.55718	124341.99591512977	8108.0
ERR1901905	1000000	589605	58.9605	104	104	52.207496025075415	0.6919251990821875	130.39995415447285	0.7376241474859742	5.861546685272357	0.8284600745169768	28502.16708	293549.20712102985	8877.0
ERR1901907	1000000	702891	70.2891	110	110	80.8248687658526	0.6624220038505998	100.74477059198105	0.8375652560263036	29.888643381936493	0.7766816880398937	5549.93427	57526.440698550774	11034.0
ERR1901908	1000000	824421	82.4421	102	102	75.96757136421579	0.6352381633300309	471.2857482204762	0.7959087465250749	6.937575267480391	0.7179433295483276	8241.20407	98462.10320863094	8215.0
ERR1901910	844771	650790	77.03744565095157	119	119	97.24147950298605	0.6760256243362558	290.7855431737679	0.9007493679803792	22.474597638781702	0.7221412812866413	4362.442660000001	34705.990450858626	9738.0
ERR1901909	1000000	690878	69.0878	106	106	105.91290215027922	0.5010131456231094	275.7581544429337	0.6898065984295881	33.26645551932547	0.5405472168523651	1659.6064200000003	19486.349996426336	11498.0
ERR1901911	1000000	551523	55.1523	83	109	48.84522467447353	0.7679438955501713	128.03810637561054	0.8852826913310722	6.937575267480343	0.8232207308304333	54308.43754	557214.3572924344	8209.0
ERR1901912	1000000	816458	81.64580000000002	121	121	80.9985629230854	0.6446648278229955	237.1566410085836	0.7660550571775195	9.535982732367776	0.7262673625913402	9367.96777	90467.64755279676	8591.0
ERR1901914	1000000	816163	81.6163	103	103	55.17545871711477	0.7113006276954745	125.6324168469693	0.7877235138377238	1.192579304013524	0.8578816549385827	40726.434091	497630.1787915946	4245.0
ERR1901913	1000000	692773	69.2773	102	102	62.366850360567035	0.7044272505692456	436.49154761177226	0.7037653125538291	1.7791447940691667	0.8654927856753205	21212.455400000003	259940.62366852042	8039.0
ERR1901918	1000000	736188	73.6188	88	105	76.16950034466323	0.7652853989408829	377.715626210093	0.8790099355568103	8.944533253099628	0.8506438002686976	6465.71993	64089.76732063131	10778.0
ERR1901916	1000000	769705	76.9705	114	114	91.13792936233911	0.5955688530595715	264.1076236556101	0.7852645697551233	17.621950197779704	0.7807857962853689	4995.9062300000005	79394.83074297584	9276.0
ERR1901917	1000000	748058	74.8058	105	105	75.78806824172206	0.553341493685516	237.1566410085836	0.6593983842303592	12.089302721751848	0.6609766675208119	9737.66682	115567.93146124748	9235.0
ERR1901915	1000000	828341	82.8341	111	111	55.219142487736285	0.73737765360115	203.11322494517358	0.8568462843752543	2.7955312656297435	0.8696290429712674	11201.048389999998	105092.13331053917	8216.0
ERR1901919	1000000	807602	80.7602	106	106	62.741574596710734	0.654964751960364	283.76122285414124	0.6483137160610962	2.7955312656297426	0.8225919262531686	8768.883609999999	107320.82645479332	8698.0
ERR1901920	1000000	733991	73.39909999999998	131	131	58.60159133959519	0.686266424281582	232.6035073694701	0.8309389771762137	7.546744681246696	0.7328211445960574	8660.134170000001	84516.63354225157	9569.0
ERR1901921	1000000	857280	85.72800000000002	104	104	75.9757969836252	0.649926020301432	248.42244754161422	0.7871665102317913	9.199599752629677	0.7639470124863355	7390.75672	132227.30454761427	7299.0
ERR1901922	1000000	816403	81.6403	119	119	96.88484853730998	0.6345812899934976	226.6166715036896	0.7280737836503122	26.187741736555033	0.7726127653435112	7935.15413	92712.32831919985	8403.0
ERR1901923	1000000	842782	84.2782	125	125	110.97871206488415	0.5855848859298399	368.26398382807986	0.8874046207377638	24.25125214641017	0.6066234077927614	7242.370429999999	66312.50052540713	9041.0
ERR1901924	1000000	773870	77.387	120	120	55.28671217487203	0.6158619489569468	160.35404809306405	0.7041469096279745	3.0165278052210796	0.7280697812381487	7965.12141	87454.97619505807	9556.0
ERR1903672	1000000	835898	83.5898	159	159	66.83136096438541	0.4484105611170147	84.06386797119247	0.6689799250341365	19.662507747377592	0.43160576673162016	11137.77319	63751.90199888597	6390.0
ERR1903673	1000000	683681	68.3681	164	164	86.5253336410124	0.4338308234263902	161.75917230322287	0.7858162587853549	26.306801645630287	0.32286638011966173	63665.39043	216924.40810599003	6184.0
ERR1901925	1000000	832647	83.2647	121	121	55.35968108076365	0.6298556691217335	212.02559661300887	0.7783818059640163	1.6797134482980254	0.7273502728661713	10516.412530000001	114120.29180378042	8752.0
ERR1903671	1000000	869938	86.9938	125	125	81.4975715775988	0.7127511779861869	143.77033671739508	0.7389315881907271	20.81175772528976	0.7614455787585491	10701.4226	74938.81878602951	6357.0
ERR1903675	1000000	630457	63.0457	135	135	49.01180601220724	0.671985264105897	87.01205734042618	0.789670335931049	10.271525258103432	0.6593452934413631	168134.87393	616146.2121550839	5727.0
ERR1903676	1000000	872080	87.208	174	174	53.990978318674074	0.36905103100645376	92.26960062956753	0.8072536944788636	8.764114600063792	0.24497295161080407	15664.68344	39687.32404208666	8132.0
ERR1903674	1000000	588216	58.8216	111	111	52.02746674505534	0.7536063760770055	118.8963581861492	0.7628430285858835	6.376545297451403	0.7820500299656262	127935.82275	426521.2234215485	6469.0
ERR1903677	960090	670960	69.88511493714131	153	153	81.43488942191833	0.7764559744029315	268.8856472071195	0.8297848573061294	15.036445629590661	0.7913574249076916	59810.636784999995	216108.54506704916	6247.0
ERR1903679	1000000	862892	86.2892	168	168	66.88071863647419	0.37650508354674644	149.21631277947716	0.8883084965791148	11.866731841127653	0.2920941987053203	14384.775499999998	64616.93763440215	7050.0
ERR1903678	1000000	857643	85.7643	166	166	75.45306283995117	0.7540265285801387	114.66615385028827	0.8418326004900596	29.8676567792533	0.7738374711842727	15780.696240000001	74103.97331894303	6977.0
ERR1903681	1000000	403743	40.37430000000001	135	135	48.79844068317989	0.7503352057644682	125.6614873230279	0.8687229629897376	5.861546685272349	0.7307939556150199	91399.36624	330222.2379256482	8185.0
ERR1903680	1000000	873293	87.3293	154	154	62.83199217410657	0.7446746321772421	146.30163797762538	0.7659672350777497	13.549738596297281	0.7749592557691999	28094.691339999998	77857.81993057327	6629.0
ERR1903683	1000000	787016	78.7016	190	190	80.26597488614678	0.6946450330013204	177.71851947054955	0.8017640082956367	29.20297056517768	0.6922038791206018	17753.033900000002	44849.92287001096	7968.0
ERR1903682	1000000	871100	87.11	147	147	81.5562755371017	0.5965849593338786	97.83022152275863	0.8371478288747937	26.347472548493307	0.5738575075464218	7779.068159999999	33410.328873547885	7041.0
ERR1903685	594787	430465	72.37296712940935	143	143	55.463226470130515	0.6712350714212713	91.43284469777731	0.7166569394486322	16.604351950585187	0.6940238598374537	107877.36601	353771.73019518284	3666.0
ERR1903684	806250	600795	74.51720930232558	159	159	62.71187049405363	0.6230959692109708	73.4557076094978	0.8405865914721374	29.44997064221567	0.46791979322506283	60356.725513	154484.05566512232	6778.0
ERR1903686	1000000	860859	86.08590000000002	170	170	51.988036298300415	0.7462892464378492	128.03810637561054	0.7833793034368554	8.149663707537261	0.7711965449227817	29348.044120000002	80173.37669865196	6949.0
ERR1903687	1000000	871208	87.1208	163	163	55.458015657495174	0.6268437587667908	69.11696488568363	0.857063003958235	25.13425039273613	0.5756527219436359	18414.09763	49915.60350178282	8321.0
ERR1903688	1000000	872269	87.2269	154	154	42.96666344249716	0.7823932623971129	80.111553259629	0.8851581391799238	7.546744681246692	0.7615620353939918	18426.294306	56368.46422581725	7564.0
ERR1903689	771441	593971	76.99500026573645	172	172	62.84265066182388	0.7746374401877935	157.17307752780948	0.778804439230151	13.659896950630497	0.8189730890032184	92072.6568	314997.12827853847	3168.0
ERR1903690	650112	382821	58.885392055522736	132	132	76.149548567244	0.28039171647644623	177.71851947791353	0.6930549216598476	9.153166444444771	0.20913026082789773	142471.17216	474037.79264872527	3940.0
ERR1903691	684654	404638	59.10109339900154	165	165	66.88069548471667	0.7085238209623348	170.46336297077332	0.8420463737067607	11.3576304872065	0.701486433458967	150706.50569999998	481250.32582077023	3677.0
ERR1903692	1000000	861565	86.15650000000002	149	149	71.17419729684991	0.7448163322799597	110.63947724834068	0.7972090811050251	16.94713617900038	0.7815640472575227	21457.933210000003	59398.6880192292	8272.0
ERR1903694	1000000	880935	88.0935	159	159	66.8641135201148	0.3962416429456979	127.98600217868731	0.8277344045486443	11.866731841127674	0.30457934760571626	11955.032589999999	44776.88449183146	7309.0
ERR1903693	1000000	637123	63.7123	131	131	66.77847835639997	0.6566621681494219	127.98600217868743	0.6460525087064345	17.388154211587363	0.7166598158251263	104451.96841	363452.61812711495	5678.0
ERR1903695	1000000	822388	82.2388	159	159	80.72367993539395	0.5170373239522174	104.3000703211166	0.7856052066953813	34.35193535630448	0.48181494155526583	28027.92149	79484.67413262068	7437.0
ERR1903696	1000000	822683	82.26830000000002	174	174	66.87880786704017	0.4882729006516252	216.71693762522517	0.8330031743843852	15.742654178648841	0.46431994117174813	25246.850400000003	81947.4310138988	7076.0
ERR1903701	784076	535937	68.35268519888378	137	137	58.96640345385718	0.6853648302814201	174.03627250597972	0.6644657998508949	7.546744681246675	0.7287491988451124	120779.48039	355796.40250036854	4607.0
ERR1903700	1000000	889908	88.99080000000002	158	158	66.87809903364911	0.46136080338852636	102.50113613678135	0.8059665943447216	14.1339106668626	0.3906570055804949	20411.226469999998	57243.280637602	7538.0
ERR1903699	1000000	720402	72.0402	133	133	58.75259894440431	0.541185020318936	149.2163127736539	0.7775635605057404	4.703124386405765	0.49496145297810334	72951.16312000001	241832.02418923785	6766.0
ERR1903702	1000000	862467	86.2467	187	187	96.88484853731006	0.679170832881716	254.3503383175285	0.9013382610536697	30.7408745339472	0.6475086788211133	14663.23534	44533.452312660374	7734.0
ERR1903703	1000000	819790	81.979	161	161	96.00387459726747	0.7068294557952661	226.6166715036894	0.8354461210167922	32.4247154801025	0.7037508781784543	18151.697500000002	47086.46996773406	7844.0
ERR1903704	1000000	872665	87.26650000000002	152	152	55.40768415747607	0.4422024118374812	122.72375557764299	0.7457027125364558	17.86405773476955	0.38061391447218246	17270.93685	43374.07356599542	7887.0
ERR1903705	1000000	861235	86.12349999999998	148	148	49.385859251874166	0.7555191699819177	71.82663228911262	0.8094391181253603	19.90031207203857	0.7718360206054546	19261.1803	49083.394252419326	7730.0
ERR1903697	1000000	839896	83.9896	145	145	75.83037981414734	0.44950872768136807	152.2155182924229	0.7839824783349232	22.474597638781702	0.43311930600450477	24573.443030000002	67224.49248172199	7381.0
ERR1903706	1000000	838319	83.8319	152	152	55.20214152533544	0.6387730050037511	94.5548307005212	0.8572708814637797	11.866731841127674	0.5979868538968522	10118.65827	50758.968099367354	7163.0
ERR1903707	1000000	860190	86.01899999999999	184	184	55.495273696367605	0.7580360108208314	114.66615385028827	0.7637984950529729	8.944533253099648	0.8138938066987745	16703.6122	44021.561496475464	7823.0
ERR1903698	1000000	795605	79.5605	147	147	34.184275795080815	0.705743485781982	45.25114695513831	0.8876599121175496	8.056016655040512	0.6630501809788023	96819.27168	283886.96829439444	5986.0
ERR1903709	1000000	878762	87.87620000000003	153	153	55.51838299348852	0.7372469588884787	97.35315959752282	0.7979255633795364	11.357630487206574	0.7792420561128287	19565.35613	46298.16847642085	7073.0
ERR1903710	1000000	825448	82.5448	164	164	86.33573085132406	0.5665251690552034	91.43284470078058	0.8043776748954601	42.929254690392945	0.49996377705581707	10041.64663	29678.85448066945	8999.0
ERR1903712	1000000	862673	86.2673	169	169	55.4606270254816	0.7630778827953848	81.39936766698138	0.8567164093521837	21.806999468141186	0.7251915735698975	17713.78785	43875.26288718773	8119.0
ERR1903708	1000000	835784	83.5784	181	181	115.73432620683751	0.7276273728246624	135.419149992443	0.8480001641224912	68.91910197324644	0.7128326187134124	16352.82659	45819.62024812813	8236.0
ERR1903711	1000000	727711	72.7711	160	160	62.71654018492656	0.6523254193668754	100.74477059198095	0.8829557095288195	9.153166444444825	0.6324782691175848	107115.875	311222.1614961049	5120.0
ERR1903713	507262	329246	64.90649802271804	135	135	55.49037662606671	0.7235446202048043	87.01205734042625	0.7590914382462295	15.021552439931217	0.7640318318428606	170491.14976	629465.8471644495	3461.0
ERR1903714	412493	327663	79.43480252998233	165	165	55.63627555508456	0.686874092237733	97.35315959752273	0.6668042057168048	15.74265417864889	0.7722011930975816	217847.64564	784965.8296155136	1834.0
ERR1903715	1000000	703855	70.38550000000002	165	165	58.75259894434623	0.7871615095977946	179.752759864827	0.805509980810013	10.271525258103368	0.8266880980867581	71005.06528	216360.67800945713	5400.0
ERR1903716	1000000	879531	87.95309999999998	155	155	48.5336094652316	0.7466944888899287	85.44295246094484	0.6777281325437365	11.357630487206697	0.8260139199888215	31886.593699999998	88990.19331373555	6883.0
ERR1903718	1000000	678864	67.88640000000001	137	137	58.833814398876434	0.5998067020161332	106.14331719598624	0.6929431610719432	9.535982732367868	0.5956102207448384	79957.2785	235889.3776559998	6412.0
ERR1903717	1000000	889853	88.9853	175	175	117.22399221801834	0.5657102521477476	207.6309980820443	0.8201880251655121	49.83825660267398	0.55035183410035	19342.995649999997	47579.42896710055	7241.0
ERR1903719	1000000	868307	86.83070000000002	170	170	108.98528359951496	0.5386372007225516	207.458017890797	0.7575803617488395	35.4154035278313	0.5223765463337798	17606.0174	50070.431296362425	7353.0
ERR1903721	1000000	874859	87.4859	156	156	62.823793204264064	0.6791615455682058	152.21551829242304	0.8047582808815287	14.282740006748538	0.675874052279764	16603.72454	45889.831361137374	7322.0
ERR1903723	1000000	864044	86.40440000000002	159	159	71.17766522393046	0.7010442414012982	88.45250534079182	0.8086224111744346	30.430356211001115	0.6839000466232934	19220.67704	53399.48615288595	8218.0
ERR1903722	1000000	785821	78.5821	159	159	55.34761620551897	0.7254654296354561	138.2251478100025	0.7129418302613278	12.306947574637089	0.787899012316114	67143.32476	229776.36284305056	5735.0
ERR1903724	1000000	878706	87.8706	205	205	66.85669805934481	0.5682900570102488	138.02981649523238	0.8251116028028025	15.814899512362667	0.5213941242365417	12476.12298	32605.321493298277	8134.0
ERR1903720	1000000	570933	57.0933	144	144	71.29267365617571	0.7351741070411886	161.75917230322258	0.8994964095857325	16.762762652475203	0.6932106747001003	82852.5721	246716.98598673297	5586.0
ERR1903726	962913	599814	62.291608899246356	138	138	62.734285823961095	0.7336208035268909	149.65375320920563	0.8117074546379629	17.38815421158727	0.7037141119189533	96651.34953	295506.7793443208	7100.0
ERR1903727	1000000	712336	71.2336	154	154	90.95060666447469	0.6946470028657636	231.80022251385708	0.6421612113595386	24.269002675080174	0.8274372176739415	14367.15024	43667.284561213295	8271.0
ERR1903725	838290	487046	58.09994154767442	133	133	71.23519092430577	0.6762894772379668	237.1566410085836	0.6121173437930365	8.291510505108167	0.7518259654241501	109438.66842	369024.44167050737	3595.0
ERR1903729	1000000	898384	89.83840000000002	149	149	66.88069548472053	0.5648935362270766	174.03627250597987	0.7831389134308598	12.089302721751842	0.5064966176063312	14164.646340000001	40252.11886921726	7558.0
ERR1903728	1000000	865666	86.56660000000002	164	164	66.88150099181652	0.6493536894373652	76.41250580422397	0.8050053694448778	28.420821182993958	0.6380597152433359	28082.00595	77296.64906079476	7145.0
ERR1903730	1000000	585278	58.5278	145	145	58.80596289513476	0.6914834961619675	118.24217908847338	0.6927714406676091	13.430682491742125	0.7442096652973849	66532.10440000001	209007.69260416334	7340.0
ERR1903881	123047	98116	79.73863645598838	111	111	189.88810013388044	0.534107833367309	916.6859991944937	0.7078575177367433	40.39077942673959	0.5483270596145902	90904.12700000001	507090.09842660883	1583.0
ERR1903731	1000000	836676	83.6676	163	163	51.862942329020896	0.8555365073166948	125.66148738307454	0.9056352917123724	5.813529912863604	0.8747715679989525	50257.5179	136109.9570867624	5273.0
ERR1903884	1000000	845378	84.53779999999998	183	183	22.351487272935753	0.7720717613942724	31.381214186771953	0.7970092360123008	3.7864788424935716	0.8026074783343684	19709.251149999996	69238.37350594514	9721.0
ERR1903882	1000000	860266	86.0266	129	129	75.98398449057821	0.4603149233499008	138.02981649523238	0.7280565236636366	13.205298936045999	0.44896421963061467	94082.78295200001	672543.4440059918	3281.0
ERR1903883	1000000	647630	64.763	151	151	121.40280397038681	0.6617894713142956	305.61886859910436	0.6605278680010838	17.79976732986504	0.7166388461322296	51506.26992	306075.29253718874	5370.0
ERR1903885	1000000	794204	79.4204	163	163	23.044148034810235	0.7689086659721155	46.7631011262752	0.8465023354311049	2.5214414766543047	0.7749018455873483	20667.461300000003	68381.09941385404	8944.0
ERR1903886	1000000	779505	77.9505	174	174	35.939847392180795	0.6012504909907489	42.03372342971969	0.8733399625965171	10.944301319285396	0.5259054560811371	28537.147839999998	87272.84930873552	9243.0
ERR1903887	1000000	889844	88.9844	136	136	75.95172096116038	0.6636695761559567	157.17307752780934	0.7454674727898604	9.965543869170656	0.7225194777337176	139346.645029	623677.7071817839	2746.0
ERR1903888	1000000	896550	89.655	143	143	86.64024916689102	0.40668553835762705	313.4557284166703	0.5382784882777879	9.535982732367886	0.4002901816304289	122159.22669000001	581335.0038569274	2213.0
ERR1903889	1000000	905023	90.5023	136	136	122.39685449718638	0.754812917835623	584.1199390014554	0.8683636362805867	16.14795814489989	0.7555962274848503	143597.08612999998	562323.6811700022	1872.0
ERR1903896	1000000	761497	76.1497	169	169	33.22246120328676	0.8191125640495809	53.8073575495531	0.8833895722648634	6.937575267480341	0.8212540138668727	28117.267569999996	78952.22563375416	8307.0
ERR1903895	1000000	878399	87.8399	131	131	66.86732775624397	0.5106078257494562	211.78442617482756	0.6251961196616326	12.823487346550722	0.49108197284863636	142037.534273	586159.9369200572	2231.0
ERR1903894	1000000	846369	84.6369	148	148	92.36186943821332	0.6257832724755136	548.0982694843872	0.7333873778786021	12.82348734655075	0.650691446442702	136952.669607	564714.3467213513	3616.0
ERR1903891	1000000	715594	71.5594	194	194	62.84371186958016	0.48910562255030676	106.80065103816918	0.8090634064687757	15.81489951236266	0.43307607759657407	9575.362280000001	28098.476457212873	10345.0
ERR1903893	1000000	632685	63.2685	151	151	150.82237615459613	0.579706663476106	539.1005086618502	0.8891993548133247	43.2354923069952	0.5902235675583262	32981.3082	133344.07898505143	7279.0
ERR1903897	1000000	779012	77.9012	182	182	43.12849601821507	0.45649279564788786	61.44623890342854	0.8304540053306209	15.742654178648875	0.3819734337208197	27249.88076	81735.12744449204	7759.0
ERR1903890	1000000	812281	81.2281	159	159	46.24982587744036	0.7361766163306004	58.872954175938375	0.9089271358374489	21.884137115330024	0.6916511900065441	20983.698819999998	70229.77211435462	8489.0
ERR1903898	1000000	743880	74.388	178	178	55.62128065827712	0.567957829424393	95.71480410688503	0.8979258998349925	14.282740006748577	0.4845806022386796	9316.541679999998	27604.177462405907	9549.0
ERR1903892	1000000	732880	73.288	169	169	40.313741889161165	0.5432946916215324	61.41699816539182	0.887339121117735	3.3050328141665974	0.49654118640330686	23407.08479	86285.35354104161	9388.0
ERR1903900	1000000	522173	52.2173	152	152	104.42695389589129	0.7507054825998242	471.2857482204762	0.7016063541676085	17.621950197779718	0.8373365741379772	59722.71149999999	247895.44392859936	7089.0
ERR1903899	1000000	895679	89.5679	135	135	80.74623672771256	0.5615118548744126	283.7612228677325	0.5280997967476558	11.357630487206706	0.5951303646491243	141221.87777999998	499563.29455833876	1973.0
ERR1903901	1000000	558427	55.8427	157	157	115.83031172414157	0.710498553280956	377.82958722228113	0.8652641251168899	28.9747282567882	0.7777797756412332	48363.57625	184782.42069844628	8021.0
ERR1903903	4538	2553	56.25826355222565	231	231	15554.858470999654	0.02627896411672783	inf	-inf	45381.6659412889	0.036175215448761996	4571.81	37318.721076185386	1316.0
ERR1903902	1000000	725890	72.589	174	174	85.51623876799928	0.7953620044026309	152.2155182864296	0.8495763630300412	36.98640344560122	0.8392529907582745	21727.422059999997	67487.6059734776	8586.0
ERR1903904	1000000	697680	69.768	156	156	35.68834351665394	0.6666703509916575	53.081102484826474	0.731793097049832	10.63144498706016	0.6744149310129842	20801.3375	59270.14750575015	8025.0
ERR1903909	1000000	752164	75.21640000000002	197	197	55.19528869277153	0.5169315546874401	76.96850269856401	0.9032498913015617	24.269002675080184	0.461219198533749	25402.664620000003	73956.07412383008	8086.0
ERR1903910	1000000	721158	72.1158	185	185	45.927546910569156	0.7350159990366542	56.85305475585788	0.8116301429958793	26.39423684825188	0.7217181548663599	12862.05256	38371.56471828782	8455.0
ERR1903905	1000000	573251	57.32509999999999	163	163	153.39579562222042	0.5940352056100678	555.6654369264403	0.4997261594732891	37.72125045762607	0.6643911281152939	25920.9663	165877.00301142642	7382.0
ERR1903906	1000000	835405	83.5405	172	172	97.71848962868737	0.5648950183372272	358.6185340953947	0.7874364444945817	16.762762652475228	0.5271697225006647	185478.687883	672978.1399901519	4552.0
ERR1903908	1000000	750815	75.0815	164	164	40.93460583992446	0.8029482826195632	64.16879720682303	0.8863660979116863	11.259436416968287	0.8035400926751908	15436.356119999999	46523.27562860916	8740.0
ERR1903907	1000000	528896	52.8896	153	153	108.96227356563224	0.7082280321125071	615.304640873395	0.8931164405428054	10.506574088614517	0.6971852899181109	46965.691620000005	203508.67674325933	7273.0
ERR1903915	1000000	711629	71.1629	182	182	45.555748304545226	0.7619166066617324	67.0791415129219	0.8593467614353294	7.813063210119272	0.7652541773452537	17021.077980000002	48713.54367389449	7693.0
ERR1903913	1000000	883876	88.3876	153	153	91.88655126538134	0.6601584735360276	444.97527449816494	0.8826442351151204	11.357630487206595	0.6248782274903171	138982.76191	607021.7671178896	2133.0
ERR1903912	1000000	891497	89.1497	152	152	104.72201233402279	0.7313469071487982	610.1366888991878	0.6404748070862195	15.02155243993115	0.8057138815274917	145001.00696899998	602379.162967948	2175.0
ERR1903914	1000000	718199	71.8199	171	171	62.75190210337748	0.5344890570494005	91.012289118076	0.8590291909914742	24.174569266340274	0.48011415514338823	12895.07326	38453.635893577135	8150.0
ERR1903911	1000000	875570	87.557	152	152	120.60508657794075	0.6407100644610911	444.9752744981646	0.4099049052182208	14.115636977163936	0.7299627069446459	177838.66696	652439.766281136	2524.0
ERR1903916	1000000	746861	74.6861	190	190	66.87132816046596	0.633332996439509	197.95714452995892	0.850186668506397	11.35763048720661	0.6240933621822102	16800.6981	58101.15705326321	8124.0
ERR1903919	1000000	889404	88.9404	161	161	103.51233581837099	0.555850479087353	457.8513720224042	0.5705769581292279	21.806999468141193	0.7312750713800609	137755.17152	571361.1105415098	2000.0
ERR1903920	1000000	739933	73.99329999999998	196	196	54.9223725264134	0.6660081958069064	86.85494932097669	0.6973301797269226	12.458512782137014	0.7214226686540175	15919.8788	49096.20855997616	7787.0
ERR1903918	1000000	893087	89.3087	131	131	66.86236284093317	0.5973468226945967	143.46790594035082	0.3841408039741534	6.636654481366443	0.759701701596161	145035.41955	586890.2826374837	2121.0
ERR1903921	1000000	711605	71.1605	164	164	58.773649105201805	0.49675080195501714	104.89402021659743	0.7617649472286078	17.62195019777968	0.42721549698124234	16200.17782	47354.95668421305	8120.0
ERR1903917	1000000	897093	89.7093	139	139	86.36023449664515	0.5151291728739177	367.3929891177966	0.36703867876071244	17.388154211587324	0.6303596031734293	85388.99483000001	491230.95178879437	1748.0
ERR1903924	1000000	724054	72.4054	150	150	163.39681834068563	0.6370596534986066	1046.4171856747125	0.7431662488277595	28.42082118299387	0.6406798898516916	99950.89272	438352.8764857007	3015.0
ERR1903927	1000000	761014	76.1014	194	194	80.22209467334987	0.5271366833983543	106.14331719598624	0.8097255016380044	43.87398439186603	0.46206952265852275	14955.487820000002	44671.51355084445	7515.0
ERR1903925	1000000	893348	89.3348	151	151	97.98618209943909	0.6383754223265501	260.48817789394167	0.4992920703384885	23.26349684431235	0.7309205506060213	171770.54355499998	605239.8969713165	2073.0
ERR1903923	1000000	793049	79.3049	136	136	85.65383546745771	0.6666419392328792	186.39026543792303	0.5910883312459397	20.671834268303005	0.7500196201568009	162364.43889	732058.8928147049	6166.0
ERR1903926	1000000	799364	79.93639999999998	206	206	40.43861319719096	0.7804783048870897	73.45570760949785	0.9093651004534266	11.25943641696829	0.732250118865228	15492.924149999999	46711.657492662096	8258.0
ERR1903922	1000000	754331	75.4331	159	159	51.58211505340732	0.43166724887686625	113.99733574253374	0.9190385480361233	5.816847591027517	0.3241011471947739	18565.818808000004	56226.64747985851	8133.0
ERR1903928	1000000	778682	77.8682	165	165	49.35194942555055	0.5805121398164625	69.66578604030374	0.7420188456940012	17.166862819022118	0.5672251628094731	16326.187550000002	68792.33357420078	8054.0
ERR1903929	1000000	879558	87.9558	135	135	111.13148818162897	0.5878982476502859	572.9936018431694	0.7582141046127263	18.475966753853054	0.5863302375782933	127592.736081	506012.9252976954	2099.0
ERR1903930	1000000	902481	90.2481	160	160	104.3018673754916	0.5241411289919745	290.7855431737676	0.5675940637610413	21.256851588679176	0.5791520866761113	95020.86124	326441.845785482	2044.0
ERR1903931	1000000	744618	74.4618	173	173	110.06873876081978	0.7473568305154626	330.0464466504575	0.7443391027814613	36.1237265563588	0.8287554356554738	18360.786350000002	75834.55262612598	8144.0
ERR1903932	1000000	211417	21.1417	153	153	62.77562338586097	0.6573997870705708	92.97542192355172	0.637177125531873	19.75252554558733	0.7258935785210289	27960.0643	83573.52954461794	10743.0
ERR1903935	1000000	872706	87.2706	151	151	86.51221243344344	0.7573320477452614	232.5855633960855	0.8022610426471057	18.821811640266912	0.8177801488346446	145837.49184	723130.6600711497	3156.0
ERR1903933	1000000	794468	79.4468	171	171	66.85045589547623	0.5215418735461801	87.01205734042632	0.8618143691342924	28.063052078468726	0.46399774064053745	16447.946229999998	51380.96668665083	7871.0
ERR1903934	1000000	796683	79.6683	178	178	55.23173423450668	0.688793716744342	67.07914151095493	0.8639029609937935	16.947136179000413	0.6632723946237602	14982.138500000003	47660.00904348037	7796.0
ERR1903936	1000000	522110	52.211000000000006	166	166	111.71890554948075	0.6221295897794274	444.97527449816494	0.890277192825136	16.94713617900051	0.6009291068752067	39881.9779	147268.57680890785	7743.0
ERR1903937	1000000	917111	91.7111	146	146	105.37997383604535	0.5667505555467354	368.2639838280795	0.5240238429590832	13.20529893604594	0.7180327309146829	166633.93126	726263.9248042825	2490.0
ERR1903942	1000000	874400	87.44	150	150	92.18788553304228	0.49469356854700003	283.7612228677323	0.6905104333425854	10.794626721330502	0.46448969445376714	163827.568019	602919.3837642305	2664.0
ERR1903941	1000000	883897	88.3897	137	137	103.69213856541049	0.5127940444735318	290.7855431737679	0.7454087044529242	25.22648575984986	0.5254276800787848	108925.20332	587723.884332342	2281.0
ERR1903938	1000000	806130	80.613	168	168	62.82127838324177	0.726026087894037	92.97542192662614	0.8363798589618393	23.389225793280556	0.7225628844115144	20504.169380000003	80522.73867546595	8017.0
ERR1903940	1000000	800780	80.078	152	152	41.10689055119513	0.6877405042887168	52.65229503700796	0.8013602287580974	13.659896950630497	0.6664922399606221	15237.12379	55172.52944859431	7802.0
ERR1903939	1000000	802569	80.2569	200	200	48.20296238937987	0.49529046037607394	91.30212522400454	0.8375682861611992	9.910515360046366	0.5107601678293477	13342.357970000001	43685.958674093716	7679.0
ERR1903945	1000000	755141	75.5141	167	167	71.20790981775306	0.45384116912968314	146.3016379776255	0.8254347184578289	17.621950197779743	0.40254899107339204	18540.93795	54236.66935727263	7671.0
ERR1903944	1000000	815652	81.5652	174	174	41.069691800280275	0.7537256857585071	64.16879720682303	0.7871027122050783	13.131585715757478	0.7840646714961973	20202.45996	53028.25671528071	8073.0
ERR1903943	1000000	549858	54.9858	152	152	103.54054728711466	0.7171369298924269	338.83403933932846	0.7207508488347785	31.59349759056474	0.7685067998432945	50941.605299999996	165409.19170703416	7321.0
ERR1903946	1000000	774012	77.4012	209	209	37.5330337945069	0.5765143983983162	49.641390802263516	0.8059553465017019	15.012682538566862	0.5401842275960008	6827.01591	20031.71880241263	9335.0
ERR1903947	1000000	821924	82.19239999999998	143	143	148.69226500366204	0.6365205522080423	828.9181965043874	0.7394789367826179	20.811757725289784	0.6686016911039463	60318.997200000005	295038.88390395977	2667.0
ERR1903949	1000000	610019	61.0019	157	157	169.29850771276364	0.7406143048352118	539.1005086618507	0.7734860561044676	60.404364838130874	0.8139668708075491	42771.5048	185394.759634935	6414.0
ERR1903951	1000000	815913	81.5913	194	194	75.94894392089773	0.7605142557410587	227.25320687386156	0.8559878072076579	15.021552439931178	0.7673588403080377	27356.1338	78633.56276828576	6962.0
ERR1903950	1000000	769434	76.9434	164	164	66.8574486771089	0.4433482700474595	121.09310732272357	0.6811259322526939	20.161571402911786	0.43190422702415027	31981.643119999997	105376.68793323053	6734.0
ERR1903948	1000000	539961	53.99610000000001	160	160	134.0071526807738	0.7315502685848455	499.96608704651175	0.5782090694345171	38.465115649505364	0.8461563672050845	40096.85442	136143.6624856751	7482.0
ERR1903952	1000000	805844	80.5844	153	153	55.314466526532044	0.7135708924796275	132.98964114027456	0.8254171903488633	10.27152525810345	0.7159955684333831	19951.809439999997	55537.20724131521	8164.0
ERR1903953	1000000	889582	88.9582	132	132	97.14192030565151	0.6043213238100936	190.38084445941703	0.465467647788544	28.420821182993983	0.7235764698211772	109272.037843	518146.2641347827	1807.0
ERR1903957	1000000	786415	78.6415	186	186	43.23749533466239	0.6845560923047014	58.047000604922154	0.8222676559875698	14.282740006748538	0.6682112354743789	21236.725309999998	58000.116687914386	8384.0
ERR1903955	1000000	526260	52.626000000000005	148	148	159.5370230995621	0.8567128103142042	1081.3561902270076	0.9525599273480083	32.159976370400166	0.8763691686214374	46466.49207	181750.42863533803	7713.0
ERR1903954	1000000	893261	89.3261	152	152	75.64494174455193	0.5897622333201499	254.3503383175285	0.5989659890598152	17.166862819022157	0.6407125945286869	134382.190559	746182.7054409046	2491.0
ERR1903956	1000000	646861	64.6861	171	171	37.488370068849136	0.7206887208080008	92.85980818399752	0.8906850455682639	6.444255327302009	0.6715574980653277	241154.36204	872561.7073547764	2208.0
ERR1903958	1000000	826969	82.6969	185	185	45.73585043933354	0.7959643755323743	96.17257310416204	0.8455400656448758	8.149663707537272	0.8274159329495471	16902.10645	56013.62564487125	7516.0
ERR1903959	1000000	760028	76.00280000000002	152	152	106.36790186211385	0.6417792305396722	447.96150577366507	0.626282105436926	14.133910666862636	0.7135235178641686	143126.86215	629365.2890845885	2884.0
ERR1903964	1989	1149	57.76772247360482	113	113	2152.5325861572446	0.3163740401300676	7943.627699446184	0.43769582123071515	2295.0579305118467	0.2768393119632225	17659.585	83106.02752792818	676.0
ERR1903966	1000000	908348	90.8348	132	132	76.11661174699096	0.5947143474874451	294.7275748222637	0.7404727199442338	10.630624956756163	0.5752241998951239	166778.70308	688467.5272152737	2797.0
ERR1903963	1000000	858045	85.80449999999998	174	174	70.90482085968088	0.7439801426887984	175.10357431938004	0.7774120873370751	15.74265417864891	0.781133504145388	18176.8019	51568.51746816211	7203.0
ERR1903961	1000000	910558	91.0558	154	154	80.99404854315712	0.5335354894457892	313.4557284323974	0.5475002938183914	10.63062495675626	0.557658480156739	119833.64569	499277.9807655049	1893.0
ERR1903962	1000000	819684	81.9684	191	191	52.17205381037787	0.7838540360171894	114.66615385028837	0.8255421859098726	7.546744681246713	0.7890114571847283	16942.33885	42039.84317896401	7868.0
ERR1903965	1000000	722686	72.2686	148	148	159.48904242715744	0.7490533233872254	1064.50916101624	0.7904448760263955	20.811757725289805	0.7789886406278893	104981.49557	441501.8469419302	2783.0
ERR1903960	1000000	531441	53.14410000000001	162	162	142.34905653677905	0.6697900658597696	676.16619516784	0.877099313683615	31.463973612119283	0.6933995144635619	41055.014	151062.43625059482	7843.0
ERR1903967	1000000	918032	91.8032	138	138	103.81566941226326	0.5170225463470502	444.9752744981646	0.7102130938454758	19.32305707865595	0.5034194500360931	116471.70413000003	505631.7510865868	1545.0
ERR1903971	1000000	920344	92.0344	136	136	81.02892726344531	0.5112743754312775	591.1333253539154	0.34755912541839623	6.937575267480376	0.642713965384351	166495.540095	801385.4265999472	2722.0
ERR1903969	1000000	866653	86.6653	192	192	55.49037662606681	0.7532469429954115	81.55301872180002	0.8505314530785373	11.866731841127658	0.7762505981138152	7856.34767	44813.49259375501	7613.0
ERR1903970	1000000	852069	85.20689999999998	194	194	58.93454294363062	0.6425391218155447	103.0594689109344	0.8510856276258327	21.806999468141147	0.5743035385959102	32757.68733	88961.70215777415	6674.0
ERR1903968	1000000	861886	86.18860000000002	185	185	38.32145251831988	0.562961384333499	55.65633371589002	0.8196481429086999	9.372233610158005	0.5018019209443567	18921.44918	54065.710083712904	7714.0
ERR1903972	1000000	711025	71.1025	123	123	92.73305344521863	0.692968890875944	925.1455173330811	0.8400233233251854	8.761351449273162	0.7004047659443464	109979.37151000001	490827.35191283125	3283.0
ERR1903973	315571	241791	76.62015837957227	116	116	211.8474924748262	0.5041614790270791	531.3159470143299	0.8242092080653952	64.7104606857394	0.4713721163016869	58741.30412	548659.1460862948	2348.0
ERR1903975	1000000	843208	84.32079999999998	167	167	81.24619943886992	0.7210513488630592	193.64637559012917	0.7874172704387844	16.00729707648205	0.7564177835577769	11163.653907	56679.6814106089	6230.0
ERR1903974	1000000	837379	83.7379	153	153	55.429233734188344	0.7421734364257577	59.66188690791934	0.8917165828339201	15.0687560914478	0.7218507997157901	9756.9599	49422.09667335554	8155.0
ERR1903976	1000000	848027	84.8027	196	196	75.58109233719917	0.671556258102439	116.75477587880135	0.7995276968701831	28.063052078468836	0.6705792363465057	9232.173240000002	30584.95651122249	8006.0
