# Supplementary material for: Comparative analysis of sequencing technologies for single-cell transcriptomics
Source: Genome Biol. 2019 Apr 9;20:70. doi: 10.1186/s13059-019-1676-5 (PMC6454680; doi:10.1186/s13059-019-1676-5)
Supplement: Supplementary file 6 — Table S4. Single-cell library statistics computed from raw paired-end sequencing reads for mESCs and K562 using plate-based Smart-seq2 protocol and sequenced across HiSeq4000 and BGISEQ-500 platforms. (CSV 87 kb) [file 13059_2019_1676_MOESM6_ESM.csv]

	num_processed	num_mapped	percent_mapped	global_fl_mode	robust_fl_mode	detection_limit	accuracy	detection_limit_ERCC	accuracy_ERCC	detection_limit_SIRV	accuracy_SIRV	ERCC_content	SIRV_content	n_genes
CL100029124_L01_12	5582801	4671516	83.6769213160204	148	148	45.389061413901224	0.3969993186529732	92.97542188666016	0.8470529642508535	3.761187003099034	0.30529557465012164	11114.428863000001	41780.63346163131	8481.0
CL100029124_L01_28	11486345	9477188	82.50830007282559	159	159	48.86972987173971	0.5939415759332367	56.43924738768159	0.790190105461681	16.762762652475228	0.5504761547939714	7261.607265299999	27454.0206724677	9132.0
CL100029124_L01_38	2031511	1612973	79.39769954482156	159	159	42.72195203590454	0.6573024328640649	81.39936767467661	0.7327180011737039	5.813529912863605	0.6731913910691047	43560.60016	138479.41419445683	6329.0
CL100029124_L01_45	8935193	7810273	87.41023277281195	148	148	36.034479588174975	0.7191649823777782	100.74477059198095	0.7752266056030013	3.142784841066191	0.7258378260508742	9042.470753000001	29603.844257927314	8258.0
CL100029124_L02_32	8412736	6996281	83.16296862281189	169	169	24.293443641984055	0.659066671274982	56.85964314014763	0.7685568134122689	2.1979632795386124	0.5962656511639585	12394.699775000001	42823.42818568494	9536.0
CL100029124_L02_31	1816293	1349350	74.29142764961381	149	149	30.572961520935323	0.6049906268312301	84.06386793897364	0.9067653494700683	0.5887162461648305	0.5083574966656753	58958.735154999995	227503.55986676563	6020.0
CL100029124_L02_35	6547095	5733900	87.57930043782775	159	159	36.13997492763369	0.44855124006857566	71.82663228911262	0.8308131243973795	4.654395322542442	0.3916572170589314	12958.6995	45024.449473795634	7869.0
CL100029124_L02_36	4186892	3729092	89.0658751169125	149	149	71.20635264218089	0.5361774065996588	174.03627250597972	0.7487085826645223	15.02155243993111	0.49466388533303246	13259.647520999999	41953.23929059825	7432.0
CL100029124_L02_26	9712085	8400669	86.49707040249338	160	160	40.689354149931624	0.7079947551888504	97.35315959752273	0.7629531369934468	3.382010570868871	0.7427848427901417	15858.23717	55855.26172286432	8377.0
CL100029124_L02_37	7983168	7082878	88.72264745023529	150	150	35.57183988954834	0.45857223215131626	76.41250580422397	0.7382782660285986	2.6327012511238594	0.3952382183670829	11807.918248000002	38680.34966950438	7628.0
CL100029124_L02_29	5392778	4672465	86.64300662849463	159	159	37.257039080523796	0.7076344101747845	64.17619394413968	0.890700456094302	5.8135299128636015	0.6897182641700721	18535.539414	66752.12098212799	7304.0
CL100029124_L02_41	8081194	7117723	88.07761575826542	149	149	33.58744140541834	0.6558649502073366	67.0791415109548	0.5478949445005019	4.2084858604287465	0.7533004043402889	13137.098600000001	45453.78481727156	7288.0
CL100029124_L02_40	4947713	4417869	89.29113309523005	159	159	38.17220549211165	0.6641665557081409	112.62838924047415	0.7000011318359711	1.5892003052811194	0.7136470280147307	11578.578099999999	43330.20456345448	7703.0
CL100029124_L02_42	5752603	5067069	88.0830643101914	159	159	46.341601613021	0.6460738249664908	112.62838924047415	0.821459049207747	7.492147015325577	0.6255893230225356	13346.635440000002	41377.19241803295	7510.0
CL100029125_L01_12	14158044	11922026	84.20673081677101	148	148	39.78253034570487	0.5946659647266346	80.11155325962908	0.8128107009239002	2.2574263042603233	0.5232961468714784	11038.328499000001	42508.094881960766	8422.0
CL100029125_L01_19	6203572	5284436	85.18376187138635	149	149	37.49501651432408	0.6746452105148625	110.69999778109222	0.7789861891833562	5.576204584709488	0.6153397431176686	17722.939659	62902.203608787335	7628.0
CL100029125_L01_20	2205540	1917648	86.94687015424793	149	149	45.32757461966733	0.7101833844128298	96.17257306545794	0.7804063212016755	4.243459464117748	0.7493221240210125	12350.174269000003	42022.17815706374	7319.0
CL100029125_L01_21	12660050	11078550	87.50794823085218	148	148	35.5221119734625	0.7515273927148767	132.98964114528692	0.7643102857274129	2.146081106778082	0.7891725663664959	10832.6451908	41677.39523229711	7578.0
CL100029124_L02_46	10637520	9363603	88.02430453714777	159	159	35.77279432692165	0.5972696436396298	75.23084672847435	0.6651273358910756	3.382010570868872	0.6033486854632895	13689.153444	45187.064277635065	7837.0
CL100029125_L02_23	5279415	4467493	84.62098546903397	149	149	39.28857933042519	0.74630441890409	159.32617034922947	0.811194079955963	5.576204584709486	0.7277808187782534	14552.963852	53429.07746244259	7746.0
CL100029125_L01_45	22018135	19289254	87.60621187943485	148	148	40.46136193971477	0.5512918777737318	118.89635818614909	0.8952688180567222	2.197963279538636	0.4477884430148824	8736.7005269	30045.47135109621	8287.0
CL100029125_L02_25	7419513	6400401	86.26443541510069	150	150	44.949536083740085	0.4851048635880178	104.89402022025853	0.787796750271999	3.761187003099035	0.3696614318513924	20027.59996	73190.57034487149	6902.0
CL100029124_L02_38	11575320	10274569	88.7627210306065	159	159	34.43580665516285	0.7263166268381941	72.37747061214753	0.7405119332250087	5.338881214373135	0.7408942187983251	12533.9110746	44165.20631205277	7550.0
CL100029125_L02_19	9237773	7709637	83.45774463174187	158	158	59.08113206592331	0.7288848164423569	226.6166715036894	0.8507026313854803	6.444255327302007	0.6893388389856411	12719.9513343	44532.59317441916	7977.0
CL100029124_L01_34	4437731	3890272	87.66353796568559	149	149	37.692475181730295	0.6164531119019334	69.11696488568363	0.8118599388812444	4.832947864786281	0.5705542655244988	12928.398869999997	44716.15191907599	8443.0
CL100029125_L02_37	19932594	17497351	87.78260872618988	159	159	29.55798852137772	0.7015379191607808	75.23084672847429	0.7882357239265775	1.1357241519534236	0.6836881929515078	12131.3721074	39431.554662216244	7650.0
CL100029124_L01_19	2585482	2192984	84.81915557718058	159	159	43.26696171161989	0.6936304109224585	152.2155182924229	0.8144749290847608	5.29935587028883	0.6792442051498572	18141.785509999998	63248.68398804533	7565.0
CL100029125_L01_9	1660737	1408462	84.80945507928107	147	147	21.551104899944985	0.5971889071441318	28.404784661033627	0.8030579321477079	2.430840522213823	0.5491568071528654	16827.918094999997	63004.226318469715	7818.0
CL100029125_L02_29	12419023	10650851	85.7623904875609	159	159	30.709179010355612	0.5913676037825706	55.3009839076032	0.8865744009133433	3.5960871895420725	0.5664480505274694	19029.1553357	68164.62277309402	7251.0
CL100029125_L01_36	2199053	1606975	73.07577398089087	137	137	34.84869607471034	0.6264627134049799	99.52942267349147	0.9225646457164328	1.1310055114171413	0.5670753559062968	89686.24443199999	316850.4048979609	5392.0
CL100029124_L01_40	2338850	2033778	86.95632468948416	148	148	42.89576195676553	0.6700367713802119	55.65633371589002	0.8120311200586657	7.813063210119289	0.6440131165106676	23968.94129	71723.63555445714	7238.0
CL100029125_L01_48	11076359	9721127	87.76464359813545	159	159	31.478572670536913	0.7493664090585305	74.0732497184768	0.7683017852516617	1.3429833714002175	0.7753400144675733	17080.934815800003	60687.27108520022	6995.0
CL100029125_L02_38	27957690	24561888	87.85378191116648	159	159	30.9636379618311	0.625499306461634	91.3021252421825	0.7825439202106969	3.142784841066203	0.6270553979028435	12774.544568000001	45050.46461559444	7513.0
CL100029125_L01_15	9619856	7995668	83.1162961275096	148	148	40.388344272237276	0.6544140310851235	101.27190214948885	0.6542666618137928	7.492147015325591	0.7105236227517399	16813.553738000002	68104.11124265686	7200.0
CL100029125_L01_2	9926795	8352736	84.14333125646294	146	146	39.59481085796155	0.47717090894028036	187.80193390767894	0.9404517992430693	2.148172433294314	0.40465878354109414	11642.3913784	40489.50720581563	8204.0
CL100029125_L01_28	27835827	23110662	83.02488013020057	148	148	38.02462010595495	0.6926762084336631	62.31776070200944	0.782535206854447	3.8794623715784082	0.6875248252830874	7085.2862887	27501.848702115523	9081.0
CL100029124_L01_2	4033475	3374372	83.65917726030284	148	148	46.094763573534976	0.4610142692180442	100.74477058856213	0.662447172125006	6.937575267480372	0.439520947939573	11609.003131000001	39707.26663277144	8198.0
CL100029124_L01_30	6791080	6006368	88.44496015361327	149	149	38.290757952871324	0.4725348700624472	112.62838924047415	0.7593541447178594	2.148172433294294	0.40419899717543073	21754.507804400004	70308.18754883322	7246.0
CL100029124_L02_30	3675187	3158333	85.93666118213848	158	158	48.3762152320172	0.42612411210472534	96.17257306545794	0.9037798239801681	5.816847591027528	0.3568376134201857	24501.119709	96369.70722849405	6638.0
CL100029124_L02_48	6384895	5606741	87.81257953341441	171	171	32.62928245601988	0.5535598666632378	71.24019578567929	0.916580124779578	1.1693847903301264	0.4369330473440135	19241.509787	67316.99126783798	8421.0
CL100029124_L01_5	3489947	2996103	85.8495272277774	138	138	75.64848694264867	0.6959780150928674	175.10357431937987	0.8033965001457622	12.637160888922583	0.7511866832327041	12760.365128999998	46238.02242744555	7629.0
CL100029125_L01_32	28280994	23996208	84.84923832592304	149	149	29.33263659202908	0.7075585935709404	72.3359647784092	0.8725839524995379	2.7939463468227865	0.6212003582168666	12773.366371999999	41579.6816819672	8576.0
CL100029125_L01_35	1893357	1380620	72.91915893304855	148	148	48.50037701813583	0.6487783765404562	149.2163127736539	0.7852172306572511	2.430840522213828	0.6281316921508032	63994.441479999994	239625.18392491623	6777.0
CL100029124_L01_41	5482857	4787922	87.32531233260325	159	159	24.460657362193658	0.5747719187887669	53.06753434575689	0.6853993327530168	1.36195044546387	0.5397830106827022	10648.473955	35079.611841134065	8332.0
CL100029124_L01_4	4442134	3832104	86.26718599664034	148	148	27.81481465257681	0.7473324562881368	59.714401972508185	0.8245481896081824	3.1427848410661916	0.7592445778632495	11641.003429	40915.03090345863	8384.0
CL100029125_L01_24	2782792	2402181	86.32269318008676	149	149	45.56654134875042	0.7242155533305512	94.5548307005212	0.7815231351668621	5.8135299128635936	0.726647904761163	23778.275722	81089.05689512032	6643.0
CL100029124_L01_29	2839361	2296305	80.87400651061981	149	149	48.32606969706286	0.7491583713105939	135.10744965641365	0.8158656584382323	9.372233610158021	0.7487364525873212	52749.486932	212598.26495644712	5956.0
CL100029124_L01_31	8561160	7436274	86.86058898560476	149	149	27.66363505741147	0.753570460008491	49.635485872732566	0.8231568868767034	2.197963279538636	0.7342784759896408	18652.6770771	58318.30301112142	7086.0
CL100029125_L02_17	8699948	7366457	84.67242562829111	149	149	35.16377334795383	0.435032066041206	128.03810638035517	0.8338684632094905	0.6091891211960392	0.36063982815132806	18101.618716	64821.15378734276	7227.0
CL100029124_L02_25	3043207	2652040	87.14622436133986	149	149	58.863358257967555	0.4024107209979768	125.66148738307454	0.7873059148220773	8.497622294456617	0.3464327928206697	19674.66825	71038.68415910819	6941.0
CL100029124_L01_3	1975593	1628206	82.41606444242309	148	148	45.5611487358796	0.663424823238352	82.71641484523069	0.7439203297663949	8.291510505108139	0.6585355951622286	20529.429965000003	74197.19580266946	7509.0
CL100029124_L01_48	4224135	3691702	87.39545492745852	148	148	35.7131267566212	0.6858261364792207	87.01205733762036	0.737109549587243	2.1979632795386355	0.7066126249959492	17636.843563000002	60317.53179417628	7079.0
CL100029125_L01_14	5677174	4879570	85.95068602794277	138	138	39.85252817289866	0.7000044017555427	88.30119824685273	0.8347156938398759	5.338881214373142	0.6618593095407448	19087.056047	65023.22947369136	6973.0
CL100029125_L02_33	1589068	678821	42.71818449556595	159	159	42.8019114761497	0.6910059337911959	125.6614873230279	0.8740648380407499	2.2909856285229293	0.6779314184295107	82215.18142000001	371835.75972459104	8556.0
CL100029124_L02_24	2255356	1954629	86.66609617284367	149	149	43.40825373902852	0.7050934834077393	100.74477059198095	0.8232735882912443	6.444255327301988	0.6964985206614279	19167.347500000003	64449.62275638239	7517.0
CL100029125_L02_32	21082663	17348183	82.28648819174313	170	170	20.677769083591482	0.7532503866873432	62.93877848406196	0.8216846742419611	1.1357241519534225	0.7328408103694394	12601.3718838	43537.6761126963	9579.0
CL100029124_L01_46	4395443	3875606	88.17327400218818	149	149	35.571839891440895	0.640098050428188	85.4429524224665	0.8049533980931053	5.576204584709493	0.6032807295152558	15667.216436	49152.32420739393	7402.0
CL100029125_L02_24	5407272	4649654	85.98890531121793	158	158	35.559041397747386	0.6846377108976424	60.5719529245256	0.7668198920405621	6.9375752674803675	0.6447986408445082	19516.915504	66423.1430294828	7655.0
CL100029125_L01_8	2690328	2225194	82.71088134978338	158	158	40.19682289398466	0.7160136293110376	103.05946887170067	0.7357497633535629	6.444255327301986	0.7545279881158594	18129.238151999998	70116.47575652774	7445.0
CL100029124_L02_39	8595309	7641148	88.89904946989107	170	170	43.24736678685329	0.44657632116329815	70.7358958326268	0.8548544647628116	5.813529912863612	0.37374446579305454	14250.578382	42605.117518381536	7652.0
CL100029125_L02_35	15919170	13805430	86.72204643835073	169	169	27.522457932432683	0.6995578759166169	60.57195292452554	0.8621647389868511	2.1481724332943033	0.6640780384903109	13433.987057999999	46259.545566192035	7812.0
CL100029125_L01_46	11038579	9760979	88.42604650471769	149	149	28.865882877577672	0.6744243650946574	64.17619394229175	0.7803371260923115	2.197963279538636	0.6317332548957114	15085.02723	49496.633793656176	7392.0
CL100029125_L01_3	3076742	2548686	82.83716996745257	149	149	35.772794326921684	0.7231683953851354	75.23084672847429	0.7300291390158968	3.382010570868883	0.7629371330235161	20184.15134	75516.55042746202	7550.0
CL100029125_L01_5	8553193	7368918	86.1540012016565	159	159	45.44904583620352	0.7471937091125833	92.97542193584894	0.833688311834568	4.2434594641177465	0.787835681837665	12414.120421	46481.54693837501	7549.0
CL100029124_L02_9	4303936	3671923	85.31546472810004	148	148	33.738414457475606	0.7939051112561712	97.35315959752273	0.8612459472836262	1.3547760380495766	0.8118557829003632	17853.478449999995	74663.80154206432	7877.0
CL100029124_L01_42	4899764	4264118	87.0270078313976	148	148	37.33042306194849	0.7808898474675787	60.57195292452554	0.8815565618433288	4.243459464117758	0.7535739438191781	14493.473495000002	50927.34034375629	7799.0
CL100029125_L02_41	19456667	16955032	87.14253062973222	170	170	31.249583299112928	0.5744331976285819	58.872954174296275	0.5410905555728184	2.9968688455189216	0.6238438048675886	13393.375409200002	45976.50004254782	7256.0
CL100029124_L01_32	11480533	9694602	84.44383200675439	148	148	36.08787516740589	0.7002137815828734	85.60306270724294	0.8366020674320239	4.019200168580642	0.6569017165073565	13197.624866	41455.38469398244	8691.0
CL100029125_L01_30	16430685	14572859	88.69294858978796	158	158	40.802592711674855	0.5663594451632116	112.62838924047415	0.8151229930190385	3.2358572672639703	0.46692258182131047	21196.0585747	70131.74962255254	7148.0
CL100029125_L02_27	34704201	30005974	86.46207990784747	159	159	33.525651223744504	0.677382136153795	85.44295245819644	0.6997635178351566	5.299355870288824	0.692584243365933	11620.7121694	40500.85778824183	8009.0
CL100029125_L01_38	5002881	4020620	80.36609305718045	158	158	28.627164411608565	0.5957452067750644	67.08198073763589	0.7831300862185255	2.197963279538637	0.5520135890304043	42532.351196999996	140186.57636333513	6363.0
CL100029125_L01_44	8698848	7479695	85.98489133273739	149	149	37.686051844267624	0.7402946748218964	58.872954175938276	0.7641394512849339	5.8135299128636015	0.7643864347543983	12330.631297	39529.26606198734	8230.0
CL100029125_L01_42	12261499	10699649	87.26216101310287	148	148	32.62196731926136	0.43622276885563793	60.5719529245256	0.894753561120215	1.4935764403693044	0.32746737733806575	14254.476924	51336.03723146551	7675.0
CL100029125_L02_36	9995403	8804918	88.08967482351638	149	149	51.87499102464613	0.6220615205862283	207.6309980820443	0.7819195267410574	2.9968688455189145	0.6268612907570794	13679.911580000002	43037.69123700264	7454.0
CL100029124_L02_43	3184994	2677122	84.05422427797352	170	170	35.96847904272538	0.6929255055837023	85.6030626990073	0.7371454142451095	3.235857267263969	0.7095163760908142	13632.356960000001	48678.24717036168	7336.0
CL100029124_L01_21	5011650	4371606	87.22887671724882	139	139	40.06424356462488	0.7295171188598352	112.74342611918772	0.8604246954201089	8.025528917952679	0.7125695075773737	10851.911687	41375.04009757144	7584.0
CL100029124_L01_26	3851903	3297304	85.6019479202877	149	149	27.61064658256342	0.5773397839365446	81.3993676644162	0.7471179371051061	1.4052995911873365	0.5631938893597986	21735.004461999997	73489.84389223909	7185.0
CL100029124_L02_19	3841970	3238084	84.28186581363205	138	138	71.14736986516705	0.7064351564272717	226.6166715036894	0.8334587892345788	10.271525258103392	0.7116950532655844	12435.5906	43991.06619179811	8011.0
CL100029125_L02_28	14426148	12520922	86.7932451545624	158	158	27.28013616406133	0.6839397949952576	46.52156248622464	0.631978675035536	3.3820105708688675	0.7642629681489879	22909.0148545	79784.46515208506	6967.0
CL100029125_L01_11	6053235	5078403	83.89568553013389	148	148	35.000725376387905	0.6778071770936858	112.74342611510646	0.6165657158004297	4.019200168580643	0.7776975121158168	18779.627956	78850.64267332123	7256.0
CL100029124_L02_44	1404247	972671	69.26637550231547	148	148	55.13062246499355	0.32743367261950146	106.14331719598624	0.7401577080618464	6.495234551721352	0.27205321079009176	67207.9132	246540.23019239906	6175.0
CL100029125_L01_29	6041823	4938122	81.73231820925571	159	159	42.129696891792584	0.6792534948734035	114.84485413459511	0.7960864285322086	5.3388812143731545	0.6859671874657471	51316.72924	216162.8033520941	5878.0
CL100029124_L01_15	4014887	3318395	82.65226393669361	149	149	49.01941585213893	0.637960956743926	130.4798827229725	0.6906578578606138	9.797068683821912	0.671217098914569	16696.268049000002	68493.1469107782	7260.0
CL100029124_L01_14	2351633	2008020	85.38832377330988	149	149	45.38343680275014	0.7457289452564428	82.71641487934029	0.7388519344155847	6.410377349051952	0.7970295025581712	19356.820184000004	64488.26585711487	6899.0
CL100029124_L01_37	9848109	8449448	85.79766937997945	159	159	32.70026543556395	0.595629380399181	70.1852008831973	0.7438286668871821	5.934242592787585	0.6104370938744572	14979.189037	48645.06649492716	8300.0
CL100029125_L01_4	10833064	9361087	86.4121821859448	148	148	24.390355885600197	0.7316244704326157	50.30141912690762	0.7581236203812874	1.3547760380495795	0.7934441450041899	11236.399492999999	41452.99283368713	8300.0
CL100033231_L01_54	2397843	2066748	86.19196502856943	148	148	33.095762838381646	0.6936648399226327	82.71641487934029	0.7957344679326088	2.1979632795386337	0.7436164508106754	124190.127644	589993.7655975779	4130.0
CL100033231_L01_52	3219441	2786866	86.5636612070232	170	170	24.676124958774082	0.5874824767467682	49.63548587143153	0.5208809683658165	2.146081106778086	0.7484317786043253	118304.09548	487501.01368067466	4990.0
CL100029124_L02_27	14785336	12920895	87.38993148346441	160	160	31.122034253937386	0.6987003516203459	104.89402026419299	0.7588509466413476	2.767172894703223	0.6963893568809973	11414.1780344	39740.60804122002	7985.0
CL100033231_L01_73	94221244	81156063	86.13350827760244	54	108	15.778104599930423	0.6977328560495043	35.76540852922764	0.7338836506009381	0.04821586076044424	0.6494550901010907	16649.9181143	61396.54765483491	10547.0
CL100033231_L01_57	1471766	1132630	76.95720651244831	148	148	43.025240397013825	0.6403400614145476	78.85184835812517	0.8048638234411544	7.546744681246675	0.6486021307331954	141649.094294	656540.923779295	6324.0
CL100029124_L01_44	3482197	2981876	85.63203058299112	148	148	45.79022214640592	0.7483062378947377	92.97542192662614	0.859760063456186	7.546744681246699	0.7220650404019177	12710.34282	39473.767864533045	8296.0
CL100033231_L01_78	9002747	7606696	84.49305528634758	64	105	19.245905844787128	0.7308309864778068	32.28524005893171	0.7807945626762185	1.4052995911873285	0.7426226974758818	15472.584636000003	47013.984268166794	9009.0
CL100033231_L01_77	8762317	2832401	32.324794914404485	44	106	23.58698821906415	0.6606134196874488	27.83269181180668	0.7211685022363941	5.861546685272357	0.6091303912422011	22318.946526	75441.69202271904	13103.0
CL100033231_L01_80	9367365	8235150	87.91319650723551	85	106	19.512357084105673	0.7507905893287996	35.73922769880295	0.7619454802624861	1.2679711800857458	0.802134753594499	16192.411100000001	49051.3457742893	8518.0
CL100033231_L01_84	8243341	6593954	79.99128023455539	75	106	25.96720686032832	0.7296236072699402	45.929329858055866	0.7707029348985973	4.0192001685806416	0.7354254784404692	12771.445598999999	41295.24352101914	9053.0
CL100033231_L01_76	11422871	9290274	81.33046411887169	54	107	19.132576294269477	0.7112656699987479	28.69601605327447	0.6902630772974995	2.1979632795386363	0.7741762465809822	14390.122523500002	45582.642913777505	8753.0
CL100033231_L01_82	9223405	7575831	82.13703073864804	64	107	21.644632927095795	0.7141484623566832	39.331327627968534	0.7775414783028718	2.7671728947032195	0.7019144605266816	23128.919710000002	74574.33773796566	8497.0
CL100029125_L01_39	1571817	1179192	75.02094709498624	149	149	42.73368323241211	0.7943624806804139	111.95765491533264	0.8383842539944173	3.5960871895420605	0.798578338500727	93349.29188599999	385924.6585849106	5489.0
CL100029125_L02_39	21155093	18620812	88.0204686408138	170	170	43.030636612316215	0.5532288382713545	81.55301872179993	0.8727033720158237	2.6232802052393023	0.45271202139704964	14572.4218478	43410.154068761876	7624.0
CL100033231_L02_62	7168986	3855307	53.777577470509776	160	160	20.744649857373968	0.7439750210089945	37.4519222909899	0.7383833561012114	2.1481724332942864	0.8013324055383704	36400.955442	129765.11411639016	8870.0
CL100029125_L01_31	21317119	18573591	87.12993064400493	148	148	31.756622949829072	0.695440576531552	82.87467160206019	0.7084212193351308	1.354776038049578	0.7247010906009772	18107.0939179	58255.17439802669	7077.0
CL100033231_L02_70	3878740	2232672	57.56178552829011	192	192	35.20991697793295	0.7225431819129191	74.60037590827844	0.7948256476228862	4.949924697221394	0.7265822631645125	42067.988689000005	168801.40629308118	7678.0
CL100033231_L02_59	2285321	1993189	87.21702552945514	212	212	23.616524428251672	0.7404921246202504	49.641390802263516	0.7879696501421134	1.8604329243606992	0.7665482984164114	145304.575531	588287.4444478988	4731.0
CL100033231_L02_51	3664647	3096686	84.50161775472506	159	159	22.969690340300634	0.6460806423946798	51.65576608607961	0.7376179080320967	0.7426967035320984	0.601059969544546	175380.791636	646746.3310429534	5694.0
CL100033231_L01_69	4587120	3409438	74.32633111843596	169	169	32.287804227423045	0.5736424227401047	48.36007189236114	0.7319960527802947	3.7611870030990318	0.5003632271801277	16688.750277	71746.95384963645	9078.0
CL100033231_L02_67	2833961	2443899	86.23615497884408	159	159	22.457093417771162	0.6982148125679436	53.80735756832126	0.8764255724140741	0.8066846620407827	0.6318476316656836	136265.99780200003	598290.9204552623	5257.0
CL100033231_L02_72	4746287	3433424	72.3391569030697	171	171	18.678433684987308	0.5811512314795694	40.19122159394537	0.7838036945526804	0.7629012531751971	0.48094448569405607	136424.464453	561938.6827781147	5784.0
CL100033231_L02_68	4062713	3504503	86.26016654388339	170	170	16.671099847016492	0.7394729494509386	33.495559815235886	0.7501373154967421	0.6501812166092903	0.7733381478394312	166158.215633	600473.5923024808	6128.0
CL100033231_L02_95	6526340	5583204	85.54877619002382	179	179	15.28637965963314	0.7748465200423993	37.45192230468196	0.851505155854214	0.9619975713718614	0.7422168957586734	37552.428145	117133.43710290993	9230.0
CL100033231_L02_91	12174712	10088045	82.86064590275319	54	106	12.128764856388553	0.7191718142173975	17.33691545236821	0.7345704090681685	0.5263694298629199	0.7664180972183748	15189.2052367	52738.78563768119	9764.0
CL100033231_L02_86	4113720	3578535	86.99024240833114	159	159	24.383537368017578	0.5648898200623438	42.56588741092933	0.8063832696009989	1.3429833714002164	0.4687399931522564	19254.555533000002	60965.85092049743	9196.0
CL100033231_L02_92	19862785	16292162	82.02355309187507	64	106	17.890496920427054	0.7636317018935779	29.10515728288454	0.8163372809219459	1.4052995911873243	0.7615558254658253	18549.8231599	60313.31324927187	8936.0
CL100029124_L01_47	8031414	6596738	82.13669473395346	149	149	35.23035548435127	0.6058892925768081	118.24217901547628	0.7899198259617372	2.1481724332942975	0.6095291781396089	12104.221012	43505.676357649805	9279.0
CL100029124_L01_43	2176128	1914896	87.9955590847597	159	159	52.134776718223314	0.5669952480490466	102.50113613678135	0.8215131282283292	10.271525258103427	0.5109708311047079	15915.947339999999	53939.2200638196	7647.0
CL100029125_L02_43	7696308	6379853	82.89498029444769	149	149	29.25795640360523	0.7065400741609779	71.24019578781466	0.7887725069297353	2.148172433294286	0.686427264851541	14255.110492	50476.44867488421	7310.0
CL100029125_L01_47	20077571	16588733	82.62320676141552	147	147	43.10374074642608	0.7603108898634405	146.3016379719651	0.7963724207396271	3.2358572672639703	0.7647451778346354	11749.734003100002	43633.67096717605	9159.0
CL100029125_L01_6	2695547	2321999	86.14203350933968	170	170	35.289537745267424	0.7313446447848798	84.06386793897364	0.7932606982961484	3.3820105708688875	0.7301775360544212	34635.942048	125199.8475781233	5532.0
CL100033231_L01_62	1523894	1222450	80.21883411838355	129	129	18.824531541128227	0.6936413163102308	29.737888443970153	0.8272028444663218	1.5998092107223785	0.6445954172356155	153325.991447	572468.813704199	6838.0
CL100029124_L01_16	3312367	2619726	79.0892434322646	148	148	45.209803175045614	0.7997763564680366	113.99733574253364	0.8298977036533826	2.6232802052392974	0.8435488607756453	11567.681689	40608.08231446536	9106.0
CL100033231_L02_69	3323734	2836754	85.3484063405796	159	159	14.84636861427971	0.7213608300509246	21.09541524918833	0.7842421127647146	0.762901253175196	0.7475187609050774	188491.244001	716146.5720576522	6497.0
CL100029125_L01_1	2544805	2207070	86.72845267122628	159	159	27.945769373985634	0.4650629939335336	43.3589966326676	0.7766245902412072	2.2574263042603335	0.32585320774134013	20836.318826000002	72486.61840491043	7501.0
CL100033231_L02_96	7541330	6676245	88.52874758166	149	149	36.017781338421	0.6034734203636339	61.4169981653917	0.7319238514976831	4.4806922125607995	0.5752195781736963	9330.068441	27164.82730427679	8562.0
CL100033231_L01_90	6853712	5577661	81.38160751429298	54	108	27.6636350575556	0.783573226634077	53.80735756687758	0.8785727383789638	4.433129633119811	0.7731084915944985	6891.752942	22539.300157016456	10401.0
CL100033231_L02_76	8694468	7318075	84.16932467863474	75	117	14.128221523212728	0.6474165525549554	17.953907860484343	0.7736796780424087	0.7629012531751971	0.5800550858035243	15552.422773	44317.37234280259	8971.0
CL100033231_L02_53	4677745	3960678	84.67066930754028	160	160	13.776494691647644	0.7902189934777317	20.025783007343705	0.8102552666084087	0.3462745985521897	0.8448870892605127	151342.17362199997	713922.7311166009	6935.0
CL100033231_L01_50	5012940	2998530	59.815796718093566	138	138	44.48645718412986	0.6942855596812395	136.83935507366678	0.779278407816519	7.546744681246699	0.6985523479442106	36389.214375	125946.44449093273	8363.0
CL100033231_L02_71	3502153	3050629	87.10724517175579	178	178	11.590074601869011	0.7682460422454629	19.050097333351204	0.7989009000898826	0.8163749679913073	0.7769466946409395	128852.425009	495773.169302426	5398.0
CL100029125_L01_43	5059835	4456314	88.07231856374761	158	158	37.6295781422731	0.7358234044640317	81.39936763363511	0.8267216217687475	3.5960871895420685	0.7312785673751275	15442.028866	53892.85960300369	7730.0
CL100033231_L01_81	9497044	7947200	83.68077477581444	44	106	12.688810467425672	0.7931813895961654	26.385028911025906	0.81482480696414	0.5263694298629201	0.8237009969680943	19034.719657999998	63616.005791516625	9926.0
CL100033231_L01_70	3684945	2057363	55.83157957581456	181	181	39.408718495658036	0.6138802182812911	73.51192086541643	0.7415590487950626	10.271525258103427	0.540370599388134	48285.947586	152783.49572211533	8551.0
CL100033231_L02_55	5615713	4243350	75.56208801981154	171	171	18.254473446972558	0.6902954551727322	40.78270892229609	0.7231804060272233	0.25525401853776114	0.7438687088051613	145883.0231225	641109.6620193771	4940.0
CL100029125_L01_34	10769739	9463835	87.874320816874	150	150	37.257039078636076	0.5961087117964531	60.57195294669626	0.8114177068832404	3.761187003099044	0.5417273617487702	12355.77067	45052.071154597936	8436.0
CL100029125_L01_27	4533034	3766713	83.09474405001154	148	148	30.301350089820506	0.37451185709215423	45.346747477074906	0.9292666251461045	1.3337003774850587	0.18960720530259936	83655.05384500002	279330.46529219364	6464.0
CL100033231_L01_79	2899407	1882644	64.93203610255478	181	181	12.35001278372514	0.7698979134334452	23.488322514393634	0.7582841207204908	0.4476087567851948	0.8006475282362654	222701.235507	853851.5632622298	7951.0
CL100029124_L02_17	3653967	3123900	85.49338294516619	138	138	40.3432032891213	0.4602952629901256	149.21631277947716	0.8681081224650922	2.1481724332943166	0.40079888677696	17856.3285	63421.972992157884	7286.0
CL100029125_L02_8	2433583	2095071	86.08997515186455	157	157	62.84837040475428	0.6125513460410198	143.46790594035082	0.8668269722070319	15.012682538566862	0.6151697433540603	16890.22771	61999.0538788795	7554.0
CL100033231_L02_61	5039413	2643970	52.465832826164466	181	181	30.374947831788035	0.7300883526684422	42.82652100899731	0.7935004628951162	5.813529912863565	0.7531328934133986	35556.320134	137460.93386324853	8837.0
CL100033235_L01_49	10210956	7411922	72.58793397993294	44	107	34.291015775411736	0.6186953406218576	104.99356367052424	0.7600812899115024	3.382010570868874	0.6579417043218735	6193.662075	85656.21710863238	11256.0
CL100029125_L02_48	16360855	14223646	86.93705799605215	171	171	27.8985592028458	0.7143087125683211	72.93880332258365	0.8548207988242776	0.8066846620407815	0.6513611400170886	19807.5329147	69439.9616762694	8355.0
CL100033231_L01_91	12093537	9776822	80.84336286398262	54	107	19.432737244358673	0.7583086880096289	24.909414814217175	0.7566773592538607	4.65439532254243	0.7764251960285459	10609.496616000002	33470.782867088994	9330.0
CL100029125_L01_16	8163805	6520523	79.87112627016447	160	160	34.75735193392709	0.7641210782687666	78.19407899834823	0.8617940365091245	3.5960871895420814	0.75055414513021	11567.635978999999	41076.857111051606	9101.0
CL100033231_L01_68	3671490	3220850	87.72596411811008	191	191	18.529211406675476	0.7223310712850078	26.99819301952186	0.7915804110978207	2.1481724332942855	0.7520871788433648	136941.876867	541914.8778756399	5844.0
CL100033231_L02_58	6405600	3312831	51.71773136005996	180	180	30.478087608863706	0.6186491832198566	64.17619394229169	0.7624295672260852	1.6797134482980234	0.5922728639599315	58317.998772	234286.9208284209	8482.0
CL100033231_L01_67	3209058	1722721	53.68307459696896	171	171	31.40113870165037	0.6597949480286537	66.09025569550224	0.7145317592807939	2.197963279538605	0.7062920144794252	45885.69909	200465.462479477	8948.0
CL100033231_L01_75	6387143	5219917	81.72538175519162	74	118	22.245449433986547	0.7704431386416472	41.50880285186019	0.8209307877800808	2.7873829997920514	0.7951573160953918	11705.363668000002	40091.34361138038	9554.0
CL100033231_L02_65	2697160	2326255	86.24831304038322	149	149	32.85499905358084	0.6515037504312423	64.17619396631517	0.8196908775008109	4.028772474914803	0.555816061075744	154123.814978	547183.0092595293	4975.0
CL100029125_L02_14	1359974	1189936	87.49696685377809	148	148	66.85744867710885	0.6834934701947278	112.62838924047415	0.860875402198945	16.76276265247522	0.6699863065368479	16390.7508	58267.91646234447	6556.0
CL100033231_L02_79	6771302	5853589	86.4470230392914	86	117	24.881333857359433	0.5222907285410898	53.807357549553124	0.8737393058847193	0.25413833208959746	0.34241473874124406	14113.148404	38703.296734843716	8672.0
CL100033231_L01_65	4171635	2369267	56.794686016394046	118	118	27.03827876224992	0.7106530159017507	42.30298690559701	0.7858623926347922	4.949924697221393	0.684271268555517	77052.68553799999	298345.14211856347	7604.0
CL100033231_L01_74	6503469	5463959	84.01606896257981	159	159	25.893330711330155	0.6703458027385636	42.03372342971969	0.8410896757099495	1.3619504454638591	0.6449625808712114	22503.385245999998	68914.128673216	8987.0
CL100033231_L01_86	7823086	6491555	82.97946615951813	85	106	36.01778133842099	0.693522630890064	62.31776070200944	0.6974001703045463	4.949924697221383	0.7634401790316774	15023.2252272	48430.57467920972	8377.0
CL100033231_L02_50	5540398	4696275	84.76421729991239	128	128	17.856939992937143	0.7120408525650672	28.696016051542845	0.7787155620852875	1.342983371400215	0.6780517688979835	137989.835344	495332.95313672477	5275.0
CL100029124_L02_21	1599491	1147330	71.73094440668937	158	158	92.3887826153399	0.7118807599982064	310.32655047485815	0.8052681286483233	21.580163867847382	0.7382538774806557	9887.554084	40488.51559120409	8269.0
CL100033231_L01_95	5940508	5130539	86.36532431233154	85	107	27.045643866244642	0.36909597700911245	44.20905088780513	0.7819755884261089	1.1693847903301269	0.22521717057539864	14092.184238999998	49011.5946271338	8174.0
CL100033231_L01_63	1270959	1032662	81.25061469331426	192	192	33.44345868404384	0.686858770767122	58.872954175938276	0.7280769174409465	4.9499246972213875	0.7542913642788431	130021.215654	722075.2613545035	6433.0
CL100029125_L02_45	3993460	2329685	58.33750682365668	159	159	34.44320024977291	0.7051772312586574	80.73391217773352	0.6416238813307386	2.79553126562973	0.7983681752792847	60982.223947	234302.4983223084	7971.0
CL100029124_L01_11	2605837	2168430	83.21433765811138	159	159	48.755006312665785	0.6907824976474645	168.61933046329892	0.6038381702718459	7.492147015325591	0.7857629890069063	18671.803259	77976.91314139416	7250.0
CL100033231_L02_73	9212493	7826376	84.95394243447457	54	106	15.067701193787459	0.6122255811072884	28.117061324628413	0.8121624010746288	0.8797714091063872	0.5055871311350628	19610.067634599996	63718.393428242074	9296.0
CL100033231_L01_56	4125361	2857086	69.25662990463137	148	148	44.753418786819886	0.6751732227274791	112.74342613143187	0.7466597433476604	4.243459464117757	0.7340974293886374	104042.730161	430823.4773242869	4603.0
CL100033231_L01_64	1799099	1516993	84.31959553087407	117	117	38.490127710519396	0.6482462097561827	62.31776070200944	0.8053241756305303	8.056016655040533	0.6567998133081175	160835.047198	668166.8222573531	6124.0
CL100033231_L01_87	8982262	7434415	82.7677371245684	44	106	22.878602363699102	0.6612486766857975	28.484364802523498	0.743307201526925	2.996868845518947	0.6186223593071598	17318.7290126	54214.443257968036	9204.0
CL100033231_L01_85	5454240	4693316	86.0489454076095	75	117	27.749826667069833	0.7691002932544633	66.09025569550224	0.8314641514021447	1.354776038049578	0.7893843728512744	13590.205025000001	46347.41589329773	8676.0
CL100033231_L01_53	3209244	2728218	85.0112362911639	149	149	30.94225009349094	0.6369610438672567	53.08110248482652	0.840218628845949	3.5960871895420556	0.589910144351857	133776.06448099998	488626.25160911924	5219.0
CL100033231_L02_84	7516954	6329295	84.20026249994346	180	180	14.268072556281826	0.8120126940810225	21.09541525067998	0.8470307455647103	1.405299591187334	0.8196256626784318	13538.10385	42699.89118543769	8782.0
CL100033231_L01_49	2594616	1896630	73.09867818590494	160	160	39.98395338751928	0.6653296006941275	71.24019581557486	0.7970271778635595	5.813529912863604	0.6748026329146242	158105.375731	576844.045458602	6467.0
CL100033231_L01_60	2551029	2193626	85.9898495861866	160	160	24.29606973768352	0.6455836674376606	33.40370700311145	0.6500859107214313	3.38201057086888	0.6789702455786458	138989.905665	571575.8029023475	5962.0
CL100029124_L01_27	1851515	1513414	81.73922436491199	159	159	40.37091609448793	0.3196525414866949	51.93075806253847	0.8595695871333159	4.174557669330454	0.2331843863850719	86677.57903	278990.64355877327	6172.0
CL100033231_L02_94	8886062	7510253	84.51722484042989	85	117	22.37998387523904	0.5030569122553792	48.615919419858734	0.8415502163618144	1.1310055114171422	0.2898938579039912	16175.316074999999	49156.904900592686	8917.0
CL100033231_L02_81	9546943	7846419	82.18776418797096	54	105	24.813110893152235	0.7615887621474948	48.33532516627864	0.8740079245453871	2.146081106778076	0.7734134843047938	8004.360903	25321.13848874177	11254.0
CL100033231_L02_63	6144635	3279959	53.379232452375135	170	170	26.56193122666723	0.6823757009746142	52.35379659741574	0.8296359928346613	3.382010570868872	0.6432596878140129	36974.723182999995	142958.08457091424	9077.0
CL100033231_L01_93	6151271	5050746	82.10898202989269	44	100	21.180665373699657	0.7269641268242363	23.07620876113005	0.7961598344101339	4.949924697221394	0.6987761013862595	11602.067346	45150.05790796531	9084.0
CL100029124_L01_22	1797854	1545544	85.96604618617529	147	147	34.91086628762898	0.5915859090589263	72.3359647980445	0.7054855489405826	2.430840522213811	0.5752967151353652	15843.367069999998	58495.90148744407	7286.0
CL100033231_L02_82	10329210	8181175	79.20426634757159	54	105	26.11902662646431	0.6049726477721284	45.25114695513831	0.7495267915680822	0.588716246164833	0.567347074595057	11149.612829	36376.03806693194	9556.0
CL100033231_L02_52	3792435	2891099	76.23331711683919	148	148	16.281593976933404	0.7346230261123196	26.131753012477247	0.8235142149078145	1.1196594215413804	0.6850445762402712	160931.550782	718453.9767740467	9352.0
CL100029125_L01_41	13591255	11901888	87.57019127372713	150	150	28.962232796036343	0.49087999547508354	64.69519409361361	0.6859995791889284	0.6300320402784265	0.4008755335934802	10376.6436711	35385.465498627265	8300.0
CL100029124_L02_23	2180081	1859438	85.29215198884812	147	147	54.84635664180427	0.754911704937604	143.47816527982707	0.8176592444165329	12.82348734655075	0.7452184786973876	13959.081369	52120.97692293491	7636.0
CL100033231_L01_59	2348103	1987236	84.63155151200776	150	150	29.318793305879957	0.7312823073312343	53.80735756687758	0.8316639554073106	4.654395322542441	0.7170999451081506	180587.58169	668586.7087501334	5947.0
CL100033231_L01_61	3185011	2822359	88.61379128674909	190	190	27.265748183413848	0.7147182198995885	34.561791852463934	0.7790700326845779	5.3388812143731315	0.7167124702045612	90564.09893	312463.03510489344	4381.0
CL100029125_L02_21	4031876	2863637	71.02492735391664	149	149	66.8450355424198	0.689649127224664	143.47816513600253	0.7441469157076166	24.269002675080195	0.7415839814941707	10158.567812000001	41593.297711897634	8426.0
CL100029125_L01_22	4509514	3896000	86.39511929666922	159	159	30.80929622240869	0.6585040892404469	85.44295245819644	0.748997063980635	1.3429833714002144	0.6702461898872536	15731.03142	59017.37429404534	7377.0
CL100033231_L02_89	7921286	6180100	78.0188974366031	54	107	12.02027061357508	0.7786466597883394	19.69565284863674	0.8277823730548483	0.8797714091063911	0.7475254930097601	21628.759553699998	76417.023197606	10631.0
CL100033231_L02_49	3008185	2590822	86.12575356901255	171	171	27.209849040321757	0.48859210175826556	48.98026103170682	0.8227295351825586	0.585932516795187	0.35464725412438325	166361.362603	628900.1975239327	5101.0
CL100033231_L02_83	10667805	8686038	81.42291689808728	65	108	10.668470144002752	0.765645209317648	13.457979804786087	0.7754068017402954	0.5263694298629199	0.7971537746573133	15362.613212	46637.63600060389	9918.0
CL100029125_L01_37	24525075	21120462	86.11782838584591	178	178	33.08883678458743	0.7059522825158586	78.19407837552703	0.7902898149714404	5.576204584709475	0.6799879942001321	14513.839322	49193.87576911424	8289.0
CL100029125_L02_46	25687660	22364618	87.06366403167902	160	160	30.8310160194506	0.6586605059685199	143.77033664429658	0.625942125684089	0.8797714091063862	0.7195406502254457	13981.2040759	46075.615099416485	7878.0
CL100033231_L02_85	6169582	5222980	84.65695082746286	54	105	20.918861229572123	0.7033226919907973	48.615919392277775	0.8043700286670586	0.7426967035320992	0.6609641609647441	13385.785665	42266.52359262631	8695.0
CL100033231_L02_90	8389347	6610705	78.79880281504626	64	106	19.23137996195992	0.5754137288604204	42.8265210225164	0.799932784645524	0.5124447915513506	0.47393428616252564	17720.285445999994	55418.865932168286	9071.0
CL100029125_L02_47	1509887	1046525	69.31147827618888	159	159	42.90138075981276	0.769196859868057	71.24019578567929	0.8398258670879452	10.271525258103418	0.7528170663106015	79949.370261	330624.77671026543	7199.0
CL100029125_L02_9	10294625	8731163	84.81283193899729	149	149	31.756622949829087	0.7773536997474991	82.87467160206019	0.7966584817210521	1.35477603804958	0.8107873170607659	18540.197988	75936.33219356234	7842.0
CL100033231_L02_64	2808570	1925029	68.54125052962897	171	171	26.412549394080447	0.5673433433269388	71.26762240973774	0.765657101154057	1.3429833714002155	0.4809181274557654	111030.27092499999	496233.8895476715	5505.0
CL100033231_L01_94	6791232	5577539	82.128529845542	66	107	18.68797105831465	0.7462348485064055	37.45192230211471	0.7736071319231419	2.7873829997920527	0.7593060834453149	5152.092488	16927.334143990483	10215.0
CL100033231_L01_51	3914648	2045187	52.244467446370656	151	151	51.42978985677798	0.7156214210635901	104.89402022025853	0.740855383755393	8.49762229445662	0.7733417023036578	37297.153932	156163.9268892109	9030.0
CL100033231_L01_92	8176566	6634482	81.14019993234324	74	106	26.046986911085003	0.7771500504958805	48.33532516627864	0.8656080887945705	1.3429833714002155	0.7998925875721191	14679.117315	49338.29135584009	8951.0
CL100033231_L02_75	6314263	5055128	80.05887622989412	85	106	24.732381653415718	0.7618426347630807	36.604100797531146	0.8546192608567077	3.235857267263974	0.76236068665902	11091.354399200001	36439.6279098794	9049.0
CL100033231_L01_96	3991390	3530690	88.45765510260837	160	160	34.42840911356969	0.6626364516073137	56.06943204641533	0.7841584949086609	3.305032814166601	0.6092285431918826	27175.165402000002	81033.85684767994	7241.0
CL100033231_L02_66	4220318	2405054	56.9875066286474	159	159	25.036279454037043	0.7734145251425999	53.794185512446376	0.8716145163975901	4.01920016858064	0.7414022679063437	41602.460204	167864.20125545838	9150.0
CL100033235_L01_55	8012375	5842386	72.91703146694955	55	107	25.13188799373899	0.6873960726056986	63.24766468276949	0.7638644967264944	0.47673418238636284	0.8239627827100833	8610.250681999998	101650.47060207014	10842.0
CL100033235_L01_53	3900052	2314814	59.35341374935514	64	106	22.89499333881152	0.638824643099317	62.8173726289141	0.822109802207745	0.762901253175196	0.6312916098598554	32357.260454000003	415436.2942098778	10303.0
CL100033231_L02_77	7538341	6308362	83.68369114636761	75	118	21.158450943565647	0.6176714974324283	38.78685583699505	0.8515947740768253	0.5859325167951864	0.46979448995729056	21571.471327	76220.838298024	9079.0
CL100029125_L02_6	2929215	2485948	84.86737914424171	158	158	51.980561736746424	0.717080059996647	96.17257306545794	0.8054885038532308	13.549738596297274	0.7055331346312643	13962.270914	52849.815605828495	7887.0
CL100033231_L02_87	5981678	5266014	88.035731779611	202	202	19.612464379607136	0.7241845467572892	41.78805688226364	0.9268598624915633	0.9836310852790672	0.6495942486866202	18012.149024000002	54127.710411518616	9065.0
CL100033231_L02_54	3158641	2570651	81.3847157685853	178	178	31.46546889354692	0.6483801027492075	58.872954175938276	0.6969370211567409	4.208485860428753	0.6825630655472905	58198.219477	292918.5727657227	3969.0
CL100033235_L01_56	10027341	7763787	77.42617908376708	86	107	23.860576930533004	0.5773060069221458	51.66715534264561	0.8135055797195959	0.4767341823863627	0.5369373975016369	16498.458639800003	211690.54372735272	10733.0
CL100029125_L02_42	14409564	12566674	87.21064703970224	170	170	37.853341133454826	0.6997623785838788	132.98964108012447	0.7779951547604481	2.7939463468227785	0.7244392698316138	13743.7629882	42184.98695742632	7431.0
CL100033231_L02_74	9084372	7244390	79.74563349013009	64	106	29.0292148934921	0.8055600349920102	71.24019581557481	0.891167716402758	1.342983371400215	0.8179139403100875	19129.2439869	62065.677087879216	9425.0
CL100033231_L01_58	3709997	3089263	83.26861180750281	159	159	22.832638715719618	0.7256309641762425	56.06943204794368	0.8263828655465533	2.787382999792051	0.74729410529264	137161.989906	549830.2106572832	5691.0
CL100033231_L01_89	5590564	4635176	82.91070453714508	64	181	20.483685139008625	0.606190032778541	42.03372342971969	0.8611842935801434	0.8797714091063872	0.5871636971303112	23495.7289	76031.96262960337	9997.0
CL100033231_L01_71	10303716	5437080	52.76814694814959	170	170	14.139885055396496	0.7577658651075685	22.059981861206627	0.819416659252449	0.19542684769346816	0.7726366915715752	44062.757453	166386.6912957539	9785.0
CL100033235_L01_54	3696556	3121616	84.44660381176425	74	117	30.787525419839984	0.6612964892609553	56.85305473403351	0.777081237901153	4.949924697221415	0.7113657855306595	18998.928405	252812.5754854334	9089.0
CL100029125_L02_30	8864323	7545384	85.12081520495136	160	160	28.54651115231346	0.5156940596553498	61.44623888256006	0.833734301342087	0.5859325167951895	0.3946102409598091	24769.434409	97795.10889252095	6601.0
CL100033231_L02_80	7158480	6282191	87.75872810987806	149	149	18.749760369844246	0.5694460840309289	32.066958334596556	0.8644385463704669	0.25413833208959674	0.40674069507166255	16028.806793999996	46166.88651347656	8972.0
CL100033231_L02_60	2730027	1935510	70.89710101768225	171	171	39.697977086468796	0.7230570087352788	64.17619396631522	0.8794810090304017	7.02218049401173	0.6756106803187165	96761.992622	433151.3183559275	5613.0
CL100029125_L02_40	11747287	10378945	88.35184668596247	159	159	35.790972863400285	0.5238905973065796	112.62838924047415	0.7429520192843051	0.9383653845072605	0.49276359952978743	11717.418103	44324.56746564803	7684.0
CL100033231_L02_78	6192811	5111213	82.5346195774423	139	139	19.184867192650696	0.7337049734270894	39.331327627968534	0.7333229501138576	1.9895481389256424	0.8048182445642925	30690.0683525	99141.194698902	7584.0
CL100033231_L02_88	5140754	4465978	86.87398774576648	150	150	39.267834150764855	0.7267577922698614	80.73391219822956	0.8056094365219526	4.749974540724795	0.6865680881669165	19041.526168	50890.02078842389	6851.0
CL100033231_L01_72	5600246	3748418	66.93309543902178	159	159	11.028558812133689	0.6167311361782034	20.722168222416077	0.7623013745553195	1.9729992712021351	0.41154533871765747	116487.55931099999	485044.12945238093	10313.0
CL100029125_L01_40	5579033	4863844	87.18077129136896	159	159	35.62734123796795	0.6150044764280062	55.65633371589002	0.8172065523185693	4.345812037629731	0.5742591164586771	23201.27482	72624.93949118578	7292.0
CL100033235_L01_59	5782304	4131068	71.44328627481363	64	107	42.676266311016775	0.6662737016378175	140.95731846267572	0.8372109322277141	3.786478842493579	0.6839246730392867	9599.567651000001	125824.57153007975	10839.0
CL100033231_L01_88	6421716	5642961	87.87310120846203	85	117	26.247212616607392	0.6958170789493213	37.04418708140137	0.8405279598450045	4.208485860428762	0.6176059102596154	13406.885002000003	43471.433761222164	8509.0
CL100029124_L02_28	6036513	5293381	87.68938292686524	168	168	35.35483270547131	0.5603516744049304	72.33596480022634	0.6152202837562095	4.9499246972213955	0.5711242629736069	22286.084991000003	77421.77705163778	7021.0
CL100033231_L02_56	3830995	3328066	86.87210502754508	148	148	17.395203691732085	0.5362363933704716	26.72573305619611	0.7340314653783131	1.3547760380495761	0.4280098180703131	172553.818145	795721.9077659525	5722.0
CL100029124_L02_45	1606597	942798	58.68291799374703	149	149	35.14313687413746	0.7074109171957155	86.85494933504967	0.6538990020811144	3.3820105708688772	0.7738187520717372	59848.41643999999	235473.95168016548	7668.0
CL100033235_L01_60	6514944	5384673	82.65110183602498	76	107	35.50917700129907	0.6447695210402228	91.43284470078049	0.8367317592440465	2.1979632795386337	0.6786133199477181	8424.419993	111071.09281701165	9034.0
CL100029125_L02_26	21839253	18717588	85.70617319191274	149	149	35.97416854550208	0.6314844899218915	97.35315959752273	0.8318093432439371	2.148172433294298	0.5629564419316595	16225.851282799998	56634.11261722973	8365.0
CL100033231_L01_66	2439221	2110887	86.53939105968668	192	192	27.030908706036556	0.38105150721082426	32.285240058931684	0.6980262509725994	1.6120294770135228	0.24970122173784712	136842.23943100002	572824.7530756105	5416.0
CL100033235_L01_58	6313775	4911560	77.79117881140839	54	106	45.74605826852454	0.5953700020319032	130.47988272784832	0.6763426665510651	4.949924697221398	0.6834951044331066	6177.3073779999995	74722.28006486758	9998.0
CL100033231_L01_83	4047785	3163822	78.16180948345823	149	149	24.30987287908199	0.6339896340860925	43.10561180621951	0.739310205461774	1.3429833714002155	0.6334447164731432	26421.045023	83581.13003767285	8616.0
CL100033231_L02_93	16999424	14191800	83.48400510511415	54	106	21.777581731311372	0.7556786585032672	31.920237305392185	0.8358017854561294	2.1481724332942873	0.7437055622813463	17231.373041	50421.125726090395	8624.0
CL100033235_L01_63	9958494	7519258	75.50597510025109	65	109	38.22112587834253	0.6655741548980575	84.22431823906108	0.7094511393430314	3.3820105708688732	0.7606254436720981	8005.9061695	84975.54602406682	10039.0
CL100033235_L01_61	6122083	4272213	69.78365043401078	83	106	48.114857667414306	0.7110734363164513	211.78442621302287	0.8266772562878411	2.2909856285229324	0.7895543376493521	7013.128703000001	83457.63522480775	11421.0
CL100033231_L02_57	3609862	3063279	84.85861786406241	149	149	18.749760328526992	0.6202319267310319	32.77120930570849	0.7694376257773304	0.45692433739972094	0.5673039479441028	129572.609067	579506.5002147582	5464.0
CL100029125_L01_26	8595727	7401572	86.10757414701513	158	158	24.098652679932357	0.5899524127744424	63.247664661046535	0.7298987662405884	1.4052995911873365	0.5817336788443431	21202.119595999997	75077.2100974802	7129.0
CL100033235_L01_57	10667683	8500409	79.68374200845676	44	106	27.82144057905419	0.6870160284686958	65.12038067161767	0.8167601129027265	1.354776038049578	0.8402440314063525	7576.3861272	99961.21651863064	10094.0
CL100033235_L01_64	6623074	5331660	80.50128988442526	44	105	33.86530779667522	0.6778578720631183	94.11278959941434	0.8606037852064103	1.3547760380495777	0.818717295223645	8430.154494	103281.9797860328	10712.0
CL100033235_L01_51	4436031	2275649	51.29921319305478	64	106	42.414468587179314	0.5692903156949981	121.09310732272357	0.7990627603576006	0.4603103368913838	0.5681307111378082	40263.898109	539718.5459484675	11229.0
CL100033235_L01_69	3014729	2682724	88.98723566861234	106	106	24.46987327136304	0.6591494904003705	54.12978798932283	0.7484176684762107	0.395788128307724	0.7592596525208054	66218.329734	876275.0977624469	7338.0
CL100033235_L01_76	6911161	5625718	81.40047670716976	75	118	27.5704023520831	0.6602948006959694	123.88587029101707	0.6175879021375441	0.2184591079707325	0.8555707560595863	7564.0131329999995	102161.33847166302	9055.0
CL100033235_L01_74	9931509	7182784	72.32318875208188	54	106	34.993706036005996	0.6307044986864573	82.71641488721176	0.8411344593991049	1.6797134482980238	0.63224841821533	5232.698824	57267.35847878131	11616.0
CL100033235_L01_79	4520537	2732426	60.44472150100752	64	107	35.8611727354307	0.7253473667516949	130.39995415447285	0.7516189965968405	0.8066846620407849	0.8291695766577114	23908.21619	322928.2458111343	9981.0
CL100033235_L01_80	6361457	4577376	71.95483676145258	54	107	42.68811425365415	0.6825448859607212	193.64637562354335	0.7718166653877679	2.148172433294303	0.7752756856658641	9361.662021	116272.99218598782	10362.0
CL100033235_L01_75	31551533	21615781	68.50944770258866	81	109	42.86900796513135	0.7190944997562936	143.4679059568637	0.7924463381060417	1.6174538231397253	0.8391315075498098	3170.0002735999997	33091.4281060381	12817.0
CL100033235_L01_73	6756062	5091006	75.3546370652016	44	106	29.196581860859386	0.723368120034008	94.55483065959312	0.8357383340800778	0.8066846620407849	0.8053717469102118	6597.787517999999	74777.89152463005	11441.0
CL100033235_L01_78	6940519	4522355	65.15874389220748	86	107	39.22109778076636	0.6380103932152434	152.73208494037067	0.7921013029036446	0.9248318013662614	0.6757023923911705	6884.6303960000005	74181.29771195778	12741.0
CL100033235_L01_71	4900816	3176149	64.80857473530939	65	106	30.963637963789257	0.6013363675392974	86.8549492984602	0.7197127231154626	2.1481724332942855	0.6490832948738599	27442.663997	324855.68927831104	8938.0
CL100033235_L01_77	7437948	5095361	68.50492904763517	74	106	40.14947198015039	0.5530700210072913	158.4828518174187	0.822372001276808	2.1481724332942873	0.5761355728373403	6168.042978	65505.29503115807	11906.0
CL100033235_L01_85	10745585	8728197	81.22588951648514	76	107	34.862958988892686	0.7369891551235688	149.6537532032345	0.7955404319634201	1.3547760380495777	0.8251795402790005	7377.9134109999995	77352.95284340112	9498.0
CL100033235_L01_87	6755002	5766211	85.3620916766568	75	106	37.71169720227268	0.7003187201483723	116.09140242187624	0.755821366533903	3.2358572672639823	0.7916508081258987	9635.214165	128056.52606657136	8852.0
CL100033235_L01_84	8607219	7114889	82.66187952229403	54	107	37.786209350563915	0.6879406427548744	130.479882664464	0.7731498783121221	2.148172433294316	0.8070496809596037	8741.004043	91008.52249649943	9675.0
CL100033235_L01_86	7042433	5049496	71.70101582791061	76	107	28.48051246937883	0.7284735642325734	96.09767332477608	0.8144996715438105	1.3547760380495777	0.8118496977039454	7794.003107999999	101666.85469254108	10566.0
CL100033235_L01_62	3862488	2543556	65.85278711545511	64	106	34.85583019724086	0.6187443809551585	129.9367367643775	0.8790168427523825	2.1481724332942873	0.6326215376381348	19896.83092	294067.97082270094	8979.0
CL100033235_L01_83	10896132	7832777	71.88584903340009	75	106	30.956514951488103	0.6065696500010956	72.33596477186407	0.792668011309485	2.1979632795386337	0.6076555004336855	8202.04177	103392.35557199875	11299.0
CL100033235_L01_90	4594359	2670982	58.136118662037525	96	107	47.759565238221285	0.6140606585464496	221.8248629474678	0.5451962829171058	1.1693847903301178	0.8503158381048623	22531.289384	245608.22169090193	10904.0
CL100033235_L01_92	7564164	4686480	61.95635102570489	87	100	35.4585922344562	0.6852567582065672	117.48470506163274	0.7585190400076467	1.2361031046090154	0.779001523602504	6129.3267989999995	71224.28973037144	12659.0
CL100033235_L01_93	3383543	2742854	81.06455274840604	64	106	43.05746579228524	0.6648514982625303	182.51721779375956	0.6796016154288802	0.7629012531751962	0.7996584339751065	31342.87599	466411.4093438124	6681.0
CL100033235_L01_91	6493211	4312442	66.41462906411019	65	106	38.12911143321433	0.7151305389737824	145.67167864824867	0.7555043019812248	2.0916807747144364	0.8133735180699236	5007.510255	61641.87517844142	12271.0
CL100033235_L01_82	10398252	8276619	79.596253293342	86	100	33.242788071068695	0.6961576450928374	77.61917647728659	0.7670017450627531	1.6174538231397235	0.832278105598365	6257.7155139999995	72585.31479767832	9737.0
CL100033235_L01_94	3742836	2412538	64.45748624839561	75	106	48.66545392916429	0.6573295869392659	186.3902654379232	0.8112845640223787	0.9248318013662638	0.7172264048675067	26557.945519	369633.4079601532	9242.0
CL100033235_L01_81	8101429	6503422	80.2749983984307	54	107	34.305946096128594	0.6592434854061568	135.10744824000926	0.6688331876667997	0.9195630433365969	0.7909248018456357	6157.532698000001	77005.56199058895	10023.0
CL100033235_L01_70	6974577	5389209	77.26933117234206	65	106	39.865483880660676	0.7166943213489523	122.72375552319741	0.8007198305077987	3.382010570868886	0.8162894539437652	6260.4081400000005	74277.34297098356	10065.0
CL100033235_L01_95	6840519	5034494	73.59812903085276	74	107	28.684968042800662	0.5961099936754014	42.82652101003724	0.8622905473565214	5.861546685272342	0.5902009425107774	4772.268007	58910.208194808816	12254.0
CL100033235_L01_68	4794341	3850033	80.30369554439287	76	108	26.13233775249448	0.6953515376803723	64.16879720682303	0.7035819720254639	0.8066846620407849	0.8262512374736193	11634.106432999999	128300.49051294473	8979.0
CL100033235_L01_72	9148612	6883314	75.23888869699579	65	107	36.0289264755059	0.6690766479986253	80.2583014758504	0.8758023217744259	2.197963279538605	0.8508139982411494	5720.644275000001	79433.56787105592	11087.0
CL100033235_L01_50	11839029	8152536	68.8615257214084	64	106	28.31701359624323	0.6646024949206318	91.30212519067817	0.7898408891219392	0.4767341823863636	0.6776114740932524	7453.5895767	83217.4807747129	11212.0
CL100033235_L02_52	3664607	2579955	70.40195578952941	106	106	20.557328373821825	0.6704362144504594	45.25114695513831	0.6886923437553342	0.23065086667086646	0.8216864635332102	64654.89141599999	855598.5882102075	9543.0
CL100029125_L02_44	3565055	2447867	68.66281165367715	160	160	42.26070067943304	0.4533428129029693	85.44295242521504	0.7234100651596339	3.761187003099028	0.3562237843332804	68747.05945100001	247115.86963296426	6347.0
CL100033235_L02_53	5763970	3757054	65.18170635863822	86	106	25.131887995479502	0.6787095177918235	65.1242400747594	0.7305410728599213	0.762901253175196	0.817215109547982	28286.584204	370085.09019520035	9501.0
CL100033235_L02_51	8099711	4951632	61.13344044003546	76	107	34.68643376605329	0.7603749635807345	101.28952043627662	0.8207992380571529	4.654395322542427	0.8148211113883164	13935.010136	134965.93645607322	12057.0
CL100033235_L01_89	6724628	5429933	80.74696473916475	55	106	20.828363765118826	0.6854477122951844	43.23512846126606	0.7905004686092635	1.6174538231397253	0.6861944381406898	7990.836637	100249.84867763842	10880.0
CL100033235_L01_66	7930121	5733680	72.30255376935611	66	105	42.73368323080099	0.4654214108212157	102.50113613678144	0.8207925929076011	1.7791447940691691	0.43473114806146124	7360.850538000001	80672.90411394266	10857.0
CL100033235_L02_50	10953092	8250088	75.3220003995219	86	109	38.1722054921116	0.6651386030687831	110.63947724834068	0.7683934898334934	1.342983371400215	0.8175785527850535	7485.058647000001	92493.87293453165	10204.0
CL100033235_L01_88	9461823	7233673	76.45115534289745	45	106	44.146254881345	0.5906065979692872	136.83935515643182	0.7322753177888732	4.749974540724801	0.6334761160989671	4972.455842	59445.38343505673	11616.0
CL100033235_L01_52	3011956	2707036	89.87634613520252	160	160	33.242788071068695	0.6382386735078895	74.07324972073381	0.6789744448279621	0.9248318013662628	0.834037968563047	78851.211068	854401.5938824939	7854.0
CL100033235_L01_96	7513906	6049217	80.50695603591528	54	106	40.233186239899965	0.6349368996246135	231.8002225034791	0.6146307968668346	0.4476087567851948	0.7874464687178399	7398.820358	103523.16874088379	9394.0
CL100033235_L02_57	7809256	5401388	69.16648653853838	54	107	16.41032471592198	0.7485780969148529	29.737888445858637	0.8141709359329059	0.44760875678519635	0.8315319833548829	17360.721938000002	229498.03882467805	13042.0
CL100033235_L02_49	10120743	7633295	75.42227877933469	75	107	33.18337723340779	0.6464999253215794	102.50113613678144	0.6618806746559992	0.47673418238636284	0.7998843938992642	4673.648752000001	59910.808546965796	10863.0
CL100033235_L02_56	8767484	6454817	73.62222731173505	65	108	34.60832308805007	0.6240570937255249	89.78310022515775	0.6603146897332266	1.6797134482980234	0.7361964701694549	7500.665564999999	84819.91388102084	10479.0
CL100033235_L02_54	6777336	4745456	70.01948848338048	97	107	33.46942703571543	0.6318757558182433	104.3000703211166	0.8095047857017975	1.3547760380495792	0.6823584589102736	9280.522802	115754.8931291971	10788.0
CL100033235_L01_65	12972055	9692785	74.72050496239801	65	108	21.282809351055185	0.7770858000288567	39.33132763076485	0.886479698963382	1.35477603804958	0.8515870157168589	7686.5660867999995	97017.38478473923	12770.0
CL100033235_L02_58	5009439	2727212	54.44146540161483	74	107	24.105728733765353	0.714285059704982	69.11696485905982	0.8572251784009466	0.4476087567851952	0.8253113282468886	34386.007153	483382.7775365252	12358.0
CL100033235_L02_59	5940389	4347770	73.18998806307128	75	106	39.67316925095398	0.6801311818888505	211.78442616527911	0.6884980836045981	1.3547760380495775	0.7818954705763579	12508.440679	146147.9064270544	9674.0
CL100033235_L02_55	7776763	6389056	82.1557246890512	64	106	30.893995271018586	0.6663802655367788	101.2719021981536	0.8009266020238558	1.3547760380495777	0.7622369964153806	6797.216256	92704.49372430392	9980.0
CL100033235_L01_67	4839620	3728219	77.03536641306547	106	106	29.91989602704573	0.5784098058808264	99.51303315899506	0.7507902840724638	0.9195630433365939	0.5947237853714822	6930.492063	93482.16958117408	10031.0
CL100033235_L02_61	7654726	5668459	74.05175573887294	74	106	33.39280152773883	0.5474786636339626	92.97542192355172	0.7111599065335436	2.1481724332942873	0.587602371068423	10434.447643	139542.68878327828	9809.0
CL100033235_L02_60	7224286	5146497	71.23883246039816	76	107	23.559311172932933	0.6562119488983157	76.96850208771843	0.5913091740952716	0.4476087567851948	0.8299827220261535	12995.861386	134892.5267753765	10173.0
CL100033235_L02_62	8718169	6062789	69.54199901378374	66	107	24.056680313676356	0.5669271557988756	77.0863625527897	0.7052753857372135	0.4767341823863626	0.5950598675094578	10246.910491	124625.50386347515	11114.0
CL100033235_L02_65	13058362	10354200	79.29172127407709	54	107	31.678113408153358	0.7235833830768297	62.31776070200944	0.8755225560137139	2.1979632795386337	0.793138780742347	4160.6789185	47940.975774602426	11410.0
CL100033235_L02_64	4205512	3472711	82.57522508555437	75	107	33.46294865865724	0.693084245575923	96.17257306545802	0.797935899327991	3.142784841066191	0.8110484514069503	10957.383603999999	143062.5294895143	8651.0
CL100033235_L02_63	10739871	8017023	74.64729324961165	55	100	28.38375404217981	0.6783790023479085	73.51192090160143	0.7045465096918306	3.235857267263974	0.8019017196844985	1383.8673296	17614.30544031618	12441.0
CL100033235_L02_67	5838005	4783060	81.92970030001688	86	107	33.24278807292886	0.7078850252794635	80.11155325962908	0.8617813646908626	2.1979632795386337	0.8091724509309436	8260.053716999999	106879.63770528571	8554.0
CL100033235_L02_68	6738729	5010193	74.34922817047547	74	106	45.64509513621846	0.6762233037361634	170.46336297770648	0.7946138063494863	1.6174538231397253	0.7672039847123923	8300.229556999999	110491.25280119145	10019.0
CL100033235_L02_66	6392412	5213571	81.55874496199556	65	106	46.22462252211706	0.6900720877345786	95.71480410688503	0.8134624428902134	6.937575267480402	0.7964268523455102	8734.495603	114478.48829961508	9638.0
CL100033235_L02_69	6972045	6050713	86.78534059949413	76	106	42.42067897342867	0.5974604463101484	155.30303571015324	0.8932285548410837	0.9248318013662618	0.623312388809564	7499.332550000001	94979.90172686534	8859.0
CL100029125_L02_31	4530245	3340638	73.74078002403844	148	148	32.71477965621342	0.6621726631924069	84.06386793897364	0.9136014092518217	1.1310055114171436	0.6079013068277078	60326.690176000004	230068.74846538054	6175.0
CL100033235_L02_72	9631716	7771199	80.68343169586811	75	106	40.2616955342312	0.7335593132593722	88.45250533792274	0.8396489533798442	2.795531265629763	0.8282215032941758	7477.011224899999	92852.88447144607	9408.0
CL100033235_L02_70	5914739	4462144	75.44109723184742	54	117	30.823781842715004	0.6231898583882177	118.2421779205196	0.5862757965640699	0.8066846620407843	0.8046508378552962	7176.022685999999	77964.95803360193	10553.0
CL100033235_L02_73	5284338	4241131	80.25851109448335	116	116	29.48611834607057	0.6917931323222871	77.61917647728666	0.7466664960586987	1.3547760380495781	0.8082292820984739	6691.867536	77835.79967071716	10437.0
CL100033235_L02_75	7011815	5735922	81.80366994850834	75	107	31.909709956941878	0.6456972266686896	103.11564422981631	0.6578115992550816	1.6174538231397253	0.8270439191281717	6948.567643	83210.21184902157	9881.0
CL100033235_L02_71	7054367	5874820	83.27919429198964	66	106	42.12969689165621	0.7411123640623064	110.69999778109222	0.770441688180015	4.345812037629722	0.8540453630251599	3720.438942	33076.096088483835	10512.0
CL100033235_L02_74	9175027	7730569	84.25663488510716	76	107	27.031085777503197	0.5936146278109726	83.68840678814729	0.7604026979716783	0.9248318013662636	0.5969753596597954	5925.162069	73785.30463965303	9887.0
CL100033235_L02_76	8493142	6936971	81.67732271519776	64	106	33.249548175886304	0.6286697258269284	87.01205734042625	0.8322157789055451	0.7426967035321044	0.8258055286101369	7024.0550201999995	80757.87217402474	9986.0
CL100033235_L02_77	3672605	2085548	56.78661331670571	65	107	26.97369951956171	0.7545932038359284	54.54714178268269	0.7845245438746151	1.6174538231397253	0.8613325357317655	21984.958567	255136.73199317924	10784.0
CL100033235_L02_80	9325310	7835462	84.02360886662213	64	107	48.1202406217858	0.7169968242777406	262.2686498457386	0.8111324905142367	2.1979632795386337	0.7867757545905303	6249.049623000001	66226.5374891133	9841.0
CL100033235_L02_79	3714066	2075204	55.874182095848596	85	105	25.97404288142688	0.7077632524375616	48.980261031706796	0.7593357704247405	1.342983371400215	0.8515742155080769	47709.102118999996	609238.8669388439	11023.0
CL100033235_L02_78	15134350	11487510	75.90355713988377	77	106	30.49303105477305	0.6935754557660597	88.30119825550301	0.7604624904201155	0.9195630433365937	0.7374014814501841	7314.575577099999	80756.30365460417	10477.0
CL100033235_L02_81	11144203	9036305	81.08525122882274	54	107	18.54281811255135	0.7374634812007465	34.95763745165072	0.8201868426797213	0.8066846620407857	0.8532745022700425	7807.829401999999	99056.33712051665	10217.0
CL100033235_L02_82	6083518	3472443	57.07952207916538	86	106	23.464621874207204	0.6501634435663587	57.652442312602254	0.7452703223727994	0.9383653845072567	0.7811484269060506	33774.345235	502088.5940265086	11092.0
CL100033235_L02_84	6820527	4755471	69.72292610233785	75	100	37.12169229835086	0.6063693692367477	88.3011974712164	0.6755769802199977	2.7955312656297475	0.6859907968527476	4421.578087	56634.675675954	11965.0
CL100033235_L02_83	7102456	4822183	67.89458463382245	75	108	35.658770729021924	0.5626132676634878	121.09310732272357	0.6863466919090357	1.3547760380495781	0.763640666123321	11555.986497	151412.9515116822	11080.0
CL100033235_L02_87	6757908	5600462	82.87271741491597	76	107	35.4391352288146	0.7062554816116633	89.92566341002527	0.8093339911280635	1.6174538231397253	0.8020792963823952	7957.154235	95150.2126140447	9343.0
CL100033235_L02_86	7580187	5565444	73.42093275535288	75	105	29.13438465305165	0.6359606595736296	65.66714357997431	0.6513955639688035	1.2361031046090158	0.7505234258578869	6902.427541	73973.26706094362	11385.0
CL100033235_L02_85	5417837	4020975	74.21734910075737	76	107	66.87946110718725	0.6667727756757236	290.7855431737679	0.6806638664319935	4.3458120376297105	0.7632568105500858	7775.783443	86257.62466683896	10569.0
CL100033235_L02_88	6793486	5154512	75.87433020396305	54	106	20.91303966140264	0.6323696629412758	49.6413907701311	0.7074503322106486	1.4052995911873243	0.6854038365169771	7468.783911	86157.8543985863	10555.0
CL100033235_L02_90	7558752	6075956	80.38305794395689	56	106	36.6702688733827	0.7064818762985587	117.0068368151357	0.7151719649949019	2.2909856285229293	0.8202660109938972	9727.567723	97096.29456218393	9687.0
CL100033235_L02_94	7680699	6398906	83.31150589288814	75	100	32.8906375804671	0.697093398938548	138.2251478206112	0.7949237177582409	0.8066846620407849	0.7913259677584641	6539.375523000001	73519.11612370171	9576.0
CL100033235_L02_91	6623368	3849575	58.121109985131426	55	104	37.34401256358183	0.5834896566982581	84.06386798193209	0.7985280456274921	2.79553126562973	0.550988933041388	18047.058782	197454.39524865025	11238.0
CL100033235_L02_95	6241847	4390665	70.34240025428372	106	106	37.29128725792002	0.5652773082470163	149.65375168058964	0.5240812625305666	2.1481724332942873	0.7709655815811656	18471.909663	287459.22021392576	9052.0
CL100033235_L02_93	7584291	6348562	83.7067301346955	64	105	45.690811640896314	0.6655117159892445	125.66148738307466	0.88633887787699	3.596087189542058	0.7220704510819168	7637.187133000001	99577.6749840681	9537.0
CL100033235_L02_96	5413372	4365006	80.63377133513086	44	107	33.028009844554404	0.6909649323682289	92.97542188666016	0.8141016339470108	0.9195630433365969	0.7970440195272822	9957.495816999999	113096.99797924742	9804.0
CL100033235_L02_89	6714050	5295468	78.87144123144749	75	105	11.698726894120236	0.7989236747924499	20.02578292504978	0.8967184902327587	0.4476087567851948	0.8414788754041171	6899.471410999999	82594.22057766758	13483.0
CL100033235_L02_92	6919714	5458527	78.88370819950073	65	107	47.99269504902156	0.4972375336709718	183.71063345439515	0.8148588982209023	2.79553126562973	0.45904904940624497	11206.414456	96159.9463678119	9490.0
CL100036997_L01_10	11396767	5953202	52.2358840888824	44	106	403640.58741086675	0.8781027939918592	1.762335506049375	0.8781027939918592	inf	-inf	160253.75488999998	0.0	10961.0
CL100036997_L01_1	11971809	6381883	53.307591191941	95	117	61698056.45856407	0.8450949017187491	1.7002327148168852	0.8450949017187491	inf	-inf	140594.6894147	0.0	10599.0
CL100036997_L01_12	10087215	4594095	45.54374026924181	44	117	131089.4445145082	0.7918565549686515	3.0167689079123026	0.7918565549686515	inf	-inf	208915.5849155	0.0	11379.0
CL100036997_L01_13	16072026	7087178	44.096357235858136	96	105	55274.97630561289	0.8229459001796671	2.9956755259578305	0.8229459001796671	inf	-inf	139675.0972288	0.0	11563.0
CL100036997_L01_14	11454185	4996248	43.61941072193264	74	104	1036329.8249713647	0.9372181221421171	2.6849318362486514	0.9372181221421171	inf	-inf	197753.282834	0.0	11154.0
CL100036997_L01_15	14588606	6214986	42.60164405015805	44	104	36209.50597878854	0.7564968968868014	3.015035880874898	0.8231873685656078	inf	-inf	179938.2224754	1.2382974729496021	11831.0
CL100036997_L01_17	14228055	6287355	44.189841830102566	44	106	53811.03945090387	0.7738653096267949	4.687714749068021	0.7738653096267949	inf	-inf	187731.105319	0.0	11799.0
CL100036997_L01_18	13979217	6120909	43.785778559700454	44	105	50437.663836021326	0.8541394159183922	3.3405880141332016	0.8541394159183922	inf	-inf	197761.81009900002	0.0	11135.0
CL100036997_L01_16	15571560	6929690	44.502220715201304	75	105	155745.43621202846	0.8826117618120429	3.7791686783358593	0.8826117618120429	inf	-inf	187770.218597	0.0	11690.0
CL100036997_L01_2	17335879	7894557	45.53883307561157	44	105	1089269.832467672	0.840482932839876	2.4051577991664677	0.861269919791809	inf	-inf	118670.61548499999	0.08404851809057659	11350.0
CL100036997_L01_24	14447170	6023086	41.69042103055477	54	104	77672.29517101373	0.856702440238594	2.4178293432307365	0.856702440238594	inf	-inf	167050.76101140003	0.0	11846.0
CL100036997_L01_19	11554479	5202158	45.02286948636974	44	106	486838.73343182646	0.8786696210659731	3.013140346407187	0.8786696210659731	inf	-inf	175920.504424	0.0	11633.0
CL100036997_L01_25	12351375	5338532	43.222167572436256	44	104	2664468.1717199944	0.8968277927646537	2.389732350972808	0.8968277927646537	inf	-inf	235885.8063386	0.0	11132.0
CL100036997_L01_20	14331713	6562804	45.79218129751831	54	105	265037.3782192594	0.8671714017165733	2.7019367495347453	0.8967157315385987	inf	-inf	151814.64357200003	0.08971186043970324	11825.0
CL100036997_L01_33	23765137	11209331	47.1671213172472	44	105	802343.7570115201	0.8610552416515801	2.688982498716366	0.8610552416515801	inf	-inf	215094.2288942	0.0	11251.0
CL100036997_L01_28	13373136	5868579	43.88334194761797	44	106	125538.8770853925	0.8913646439871572	2.4241875584870085	0.8913646439871572	inf	-inf	191930.45298419998	0.0	11491.0
CL100036997_L01_30	12271932	5737067	46.74950121953088	95	105	183803.81777836444	0.8104676878365383	3.375897719067741	0.8104676878365383	inf	-inf	216923.3752067	0.0	11119.0
CL100036997_L01_32	19955448	9516183	47.68714287947833	106	106	53811.039571908506	0.9070452375215081	4.687714749305037	0.9070452375215081	inf	-inf	177919.75652600004	0.0	11197.0
CL100036997_L01_27	13589899	5579652	41.057347078149746	44	105	46134.75803368831	0.9182922306812831	3.7275461550873628	0.9182922306812831	inf	-inf	166447.7132582	0.0	11670.0
CL100036997_L01_26	14481044	6928553	47.84567328156728	44	100	1405421.5851206125	0.7793859960735664	2.6754719105670577	0.7841500768179955	inf	-inf	157317.7079697	2.3717612665477494	11711.0
CL100036997_L01_34	23386722	11534428	49.32041352353698	95	105	316173.72491237125	0.852648206469201	3.376765238607336	0.852648206469201	inf	-inf	221531.83893549998	0.0	10693.0
CL100036997_L01_35	18362165	8365217	45.55681206437258	117	117	261876.7584152752	0.8126115844797532	3.37701681400064	0.8126115844797532	inf	-inf	211233.4287933	0.0	11357.0
CL100036997_L01_39	19064969	8859872	46.47199793506089	117	117	1532665.8541046428	0.9028405479171643	2.154637645151401	0.9028405479171643	inf	-inf	182800.63913700002	0.0	11531.0
CL100036997_L01_36	10263368	4472130	43.57370796798868	95	107	9225942.859996466	0.9391551820173576	1.5604643973332275	0.9391551820173576	inf	-inf	383564.902947	0.0	12780.0
CL100036997_L01_40	23923636	10755568	44.95791526003824	98	118	17880.772385177028	0.8556010481825295	4.017797418947416	0.8556010481825295	inf	-inf	188386.905423	0.0	11894.0
CL100036997_L01_41	25141804	11736469	46.68109336943363	97	106	89251.22191654553	0.8910212495687705	2.7010715830197056	0.9012555238207345	inf	-inf	394953.0100883	1.519211851052108	12357.0
CL100036997_L01_42	10572967	4594708	43.45712986714136	106	106	389078.7867295508	0.8291661930395225	1.4361932898630982	0.8291661930395225	inf	-inf	389768.176814	0.0	12835.0
CL100036997_L01_43	23430186	11056638	47.18971501122526	44	106	663074.0078667396	0.8859308731772122	2.167219499128083	0.8859308731772122	inf	-inf	141871.3545845	0.0	11694.0
CL100036997_L01_44	20129100	9212336	45.766258799449545	44	100	516162.93243163597	0.8722893811745029	2.1704502626962507	0.8722893811745029	inf	-inf	164283.7908942	0.0	11737.0
CL100036997_L01_48	20160078	9232393	45.79542301374032	98	105	183414.24428553163	0.9026633672399978	3.018542901118451	0.9026633672399978	inf	-inf	228262.20635660004	0.0	11191.0
CL100036997_L01_46	14246331	6483998	45.513458868813316	97	107	43130.97661468111	0.8283637032652517	4.662158284830532	0.8283637032652517	inf	-inf	179868.6598553	0.0	11550.0
CL100036997_L01_8	7814476	3394186	43.43459497476223	44	104	36546.64776744762	0.8073230536936244	4.192192509143921	0.8515761782808	inf	-inf	167183.90858199997	0.6864700243231296	11646.0
CL100036997_L01_6	5102291	2047893	40.13673465507946	96	106	114787.70903425058	0.8672976000390831	4.747924366074908	0.8672976000390831	inf	-inf	262754.517106	0.0	7330.0
CL100036997_L01_47	17537989	7638145	43.55200017516261	44	106	96144.57935161148	0.7978525750328125	3.012597525243337	0.7978525750328125	inf	-inf	199514.70290210002	0.0	11572.0
CL100036997_L01_45	20605082	9237200	44.82971725130723	98	105	72154.91396432565	0.865377915693848	3.0056451706643985	0.865377915693848	inf	-inf	201962.1348772	0.0	11337.0
CL100037423_L01_11	15170946	10120611	66.71048067800122	106	106	35151.14974043002	0.7020669526155553	36.59618511824092	0.7020669526155553	inf	-inf	20096.078574	0.0	9224.0
CL100036997_L01_5	15053234	6907117	45.884605261567046	44	104	20491448.19254312	0.8917570855824656	1.7144479364430363	0.8917570855824656	inf	-inf	170774.213927	0.0	11269.0
CL100036997_L01_7	14796141	6772659	45.773144497609216	44	106	55274.97616573219	0.8560688311929255	2.995675525843648	0.8560688311929255	inf	-inf	228605.03508600002	0.0	11174.0
CL100037423_L01_12	5623253	3807504	67.70998921798467	117	117	49061.60987783566	0.8574913767413497	43.90076188789618	0.8574913767413497	inf	-inf	21872.634074999998	0.0	9571.0
CL100037423_L01_15	9981237	6310414	63.222764873732594	107	107	22736.59701705799	0.7127698340126051	34.171002567082844	0.7127698340126051	inf	-inf	24937.384905999996	0.0	9335.0
CL100037423_L01_14	9043635	5267437	58.244688114900704	107	107	112336.18266027629	0.8268342266586741	75.86521541024119	0.8268342266586741	inf	-inf	26892.024341	0.0	9090.0
CL100037423_L01_16	12090756	7789963	64.42908119227614	96	106	41574.62049420863	0.7318962833330191	48.99487942960968	0.7318962833330191	inf	-inf	19988.558657999998	0.0	9384.0
CL100037423_L01_23	13400447	7376375	55.04573839962205	107	107	28766.284847744253	0.6900467987895502	37.8897889960281	0.7483194377597358	inf	-inf	21735.3922209	0.24992726270611965	9717.0
CL100037423_L01_19	7409737	4476024	60.40732619794738	96	107	28422.832281924362	0.7626632465319026	24.206731003373132	0.7626632465319026	inf	-inf	26472.459934000002	0.0	9029.0
CL100037423_L01_27	16339745	10366960	63.44627777238875	96	107	71454.90247995143	0.739208086667527	94.45776100470874	0.739208086667527	inf	-inf	11959.981571299999	0.0	9290.0
CL100037423_L01_28	7555578	5456576	72.21917370186634	106	106	94078.00758158017	0.8543720194163839	55.29393280552952	0.8543720194163839	inf	-inf	23871.673815	0.0	9809.0
CL100037423_L01_30	11259686	7082708	62.90324614736148	86	107	145639.9440061775	0.8294511583220681	50.58627319944733	0.8294511583220681	inf	-inf	28764.364425	0.0	8537.0
CL100037423_L01_31	8913573	5393433	60.50809254605309	96	106	17547.18614205818	0.8406686914874751	32.654014226000285	0.8406686914874751	inf	-inf	34206.370410999996	0.0	8957.0
CL100037423_L01_36	12438636	7266102	58.4155851172106	86	106	58458.42707704492	0.7804285217263658	45.013611696663055	0.7804285217263658	inf	-inf	28393.981827999996	0.0	8790.0
CL100037423_L01_40	7243882	4076979	56.28168708435614	96	107	29786.680568097083	0.8193993619892772	69.11696485905988	0.8193993619892772	inf	-inf	26291.52255	0.0	9342.0
CL100037423_L01_35	8185852	6251832	76.37362610513847	108	108	68685.77921908656	0.9625481517895526	232.58556325717308	0.9625481517895526	inf	-inf	12668.247399999998	0.0	9146.0
CL100037423_L01_4	16948721	11742516	69.28260840449258	107	107	45091.39252980795	0.8158538091243205	43.35899662208874	0.8158538091243205	inf	-inf	21160.681881099998	0.0	8615.0
CL100037423_L01_39	9285548	6327999	68.14890192802837	117	117	22737.342157236206	0.6145241961185439	28.69601604692514	0.7201028848835392	inf	-inf	32934.2472359	0.32763647140506624	8996.0
CL100037423_L01_44	9910651	6194883	62.50732671345203	107	107	23067.146322152614	0.7497898538387926	44.20905087346389	0.7497898538387926	inf	-inf	22911.154579000002	0.0	9062.0
CL100037423_L01_47	3160603	1742145	55.120652609644424	97	107	30459.42482978857	0.7703488795600739	53.08110246639815	0.7703488795600739	inf	-inf	34018.271649999995	0.0	8825.0
CL100037423_L01_48	6509626	4699981	72.20047664796719	117	117	23067.146325198195	0.8080303245818098	44.20905087456705	0.8080303245818098	inf	-inf	13421.708342	0.0	10843.0
CL100037423_L01_7	10838428	7097693	65.48636942552922	96	106	91709.09081747125	0.729670382720205	31.502462595636146	0.729670382720205	inf	-inf	18414.973272000003	0.0	9844.0
CL100037423_L01_38	11875637	8156958	68.68648814375177	107	107	25207.61826755603	0.7111748283015046	26.998193012510388	0.7111748283015046	inf	-inf	19562.392400999997	0.0	9110.0
FCHHLWGBBXX_L4_CWHPEI17050230	7465749	2856551	38.26208194248159	65	106	2917754.37800423	0.8489585304357236	2.143995101884568	0.8489585304357236	inf	-inf	262310.89371820004	0.0	7781.0
FCHHLWGBBXX_L4_CWHPEI17050229	7422163	3486442	46.97339576077756	44	105	243162.5650888841	0.865116733703563	1.5905316825310016	0.865116733703563	inf	-inf	184266.17474900003	0.0	11086.0
FCHHLWGBBXX_L4_CWHPEI17050225	8740007	4646706	53.16592995863734	44	117	25513.69470445692	0.721720983566075	2.4178293448545274	0.8045106638707971	inf	-inf	155922.4399843	0.4008874208639325	10628.0
FCHHLWGBBXX_L4_CWHPEI17050231	7075052	3333449	47.11554063489569	44	105	102392.88695588028	0.8620151861807683	2.1753984707945175	0.8620151861807683	inf	-inf	236522.47964499998	0.0	10925.0
FCHHLWGBBXX_L4_CWHPEI17050226	8123787	3861214	47.52972966918014	44	105	1141218.9923120956	0.8690127393902832	2.159296883187329	0.8690127393902832	inf	-inf	117504.037614	0.0	11037.0
FCHHLWGBBXX_L4_CWHPEI17050238	7275196	3382563	46.49445870599225	97	105	406899.2393568847	0.8350470412827993	2.173169777800883	0.8350470412827993	inf	-inf	194659.7069934	0.0	10801.0
FCHHLWGBBXX_L4_CWHPEI17050239	6931833	3113880	44.92145151217578	117	117	15421.414955504832	0.8094560173726215	3.314993751248933	0.8845458345895564	inf	-inf	172840.031455	1.74835601537775	11544.0
FCHHLWGBBXX_L4_CWHPEI17050234	7841238	4333664	55.26759932551467	105	105	201702.6886240106	0.8807307083960343	1.7641880944356132	0.8807307083960343	inf	-inf	151743.979395	0.0	10793.0
FCHHLWGBBXX_L4_CWHPEI17050236	4755525	2236430	47.028035810977755	86	117	41271.726428050206	0.8032192984739954	2.6697551055940982	0.8032192984739954	inf	-inf	206595.47062	0.0	11132.0
FCHHLWGBBXX_L4_CWHPEI17050237	6868713	3310000	48.18952254956642	85	117	43961.35252744339	0.8780480586836773	2.6830160768760645	0.8990436288200987	inf	-inf	142078.768717	0.1872724272918546	11041.0
FCHHLWGBBXX_L4_CWHPEI17050232	6854310	3119759	45.51528892040191	44	117	109446.9778162806	0.835074415239101	2.70107158296471	0.835074415239101	inf	-inf	170509.380701	0.0	11399.0
FCHHLWGBBXX_L4_CWHPEI17050241	6369888	3120411	48.98690526426838	44	116	81868101.15767139	0.856338575324023	1.268758844857943	0.856338575324023	inf	-inf	183152.045199	0.0	11349.0
FCHHLWGBBXX_L4_CWHPEI17050240	8313652	3897469	46.88034813100187	64	117	183414.24428553067	0.869089130309542	3.0185429011184515	0.869089130309542	inf	-inf	183956.04109900002	0.0	11326.0
FCHHLWGBBXX_L4_CWHPEI17050249	7453514	3337896	44.78285007581659	44	105	3721140.3446936957	0.9034298461689558	2.3837317170762082	0.9034298461689558	inf	-inf	215629.68484499998	0.0	10927.0
FCHHLWGBBXX_L4_CWHPEI17050248	7075244	3017569	42.64968105693599	86	105	10773590.200025402	0.8679877304565403	1.4133541401709857	0.8679877304565403	inf	-inf	178253.165667	0.0	12114.0
FCHHLWGBBXX_L4_CWHPEI17050244	7914045	3984464	50.34674430079688	105	105	659157.2765006172	0.8910391054711535	2.1634960362759323	0.8976235931163519	inf	-inf	139785.780202	1.741496913051467	11370.0
FCHHLWGBBXX_L4_CWHPEI17050242	6805282	3117971	45.81692573503934	105	105	321589.93346393836	0.863143996397263	1.9572813440667236	0.863143996397263	inf	-inf	196030.321343	0.0	11096.0
FCHHLWGBBXX_L4_CWHPEI17050243	6877417	3256682	47.353272311392494	86	105	25410893.287489478	0.8678072028876908	1.5487965756556141	0.8678072028876908	inf	-inf	178228.110222	0.0	11384.0
FCHHLWGBBXX_L4_CWHPEI17050250	9165064	4878429	53.22853173747614	105	105	26171555.665066257	0.8865883287104883	2.102304189333194	0.8919306773564445	inf	-inf	136968.654919	3.4262386164901306	11140.0
FCHHLWGBBXX_L4_CWHPEI17050252	7455823	3465524	46.48077080156007	105	105	140256.01670525176	0.8659115509418568	1.9583261369450302	0.8659115509418568	inf	-inf	187544.90965599997	0.0	11191.0
FCHHLWGBBXX_L4_CWHPEI17050251	10885039	4829001	44.36365363504899	86	117	50437.66417404751	0.8989439096820693	3.340588014529928	0.8989439096820693	inf	-inf	155151.470799	0.0	11286.0
FCHHLWGBBXX_L4_CWHPEI17050256	4872073	2278799	46.772677667186024	44	105	406613.05798566615	0.8920839967010561	1.955449767359438	0.8920839967010561	inf	-inf	175016.426954	0.0	11325.0
FCHHLWGBBXX_L4_CWHPEI17050254	8336946	4168070	49.99516609559424	105	105	834042.2394085901	0.8851370039493124	2.4094026515036124	0.8851370039493124	inf	-inf	195809.70321	0.0	10734.0
FCHHLWGBBXX_L4_CWHPEI17050257	7204458	3454937	47.95554363700919	44	105	890203.3346133099	0.8837555128684506	1.946741899630259	0.8837555128684506	inf	-inf	203014.949515	0.0	11253.0
FCHHLWGBBXX_L4_CWHPEI17050258	6828311	3486106	51.05370859645966	105	105	18179802.87285034	0.8431081192347812	1.4083338430274184	0.8431081192347812	inf	-inf	196193.47731000002	0.0	10959.0
FCHHLWGBBXX_L4_CWHPEI17050260	6740613	2881154	42.7432045127053	64	105	20491448.151496958	0.891596520988525	1.7144479364695724	0.891596520988525	inf	-inf	197557.741978	0.0	11549.0
FCHHLWGBBXX_L4_CWHPEI17050264	8474985	3882402	45.81013417722863	105	105	890203.3266619742	0.8874028759290746	1.94674189974726	0.8874028759290746	inf	-inf	184437.74710499996	0.0	11801.0
FCHHLWGBBXX_L4_CWHPEI17050265	7079041	3232795	45.667132031019456	44	106	25513.694795406598	0.8315261252360104	2.3710367164225556	0.8373932044677738	inf	-inf	410140.31570700003	4.594139707591543	12172.0
FCHHLWGBBXX_L4_CWHPEI17050266	6643044	2878980	43.33826480751896	44	106	1000443017.462414	0.9272285028992623	1.251096117265706	0.9272285028992623	inf	-inf	374132.537501	0.0	12519.0
FCHHLWGBBXX_L4_CWHPEI17050259	5231149	2265186	43.30188262655108	75	105	63855.45198041292	0.8649901818650868	2.1654183989243685	0.8649901818650868	inf	-inf	204068.245312	0.0	11213.0
FCHHLWGBBXX_L4_CWHPEI17050263	4034599	1676978	41.56492380035785	44	105	960471.8291488909	0.8625511436916925	1.2981389939435721	0.8625511436916925	inf	-inf	255650.06854	0.0	12090.0
FCHHLWGBBXX_L4_CWHPEI17050267	9462924	4353754	46.00854873187188	44	105	521976.75822075526	0.8982721886101808	1.7604639135515212	0.8982721886101808	inf	-inf	141226.81932100002	0.0	11952.0
FCHHLWGBBXX_L4_CWHPEI17050270	5929681	2667178	44.98012624962457	44	105	63000.27558541772	0.9064704424087633	3.0010584928742152	0.9064704424087633	inf	-inf	183711.42162500002	0.0	11531.0
FCHHLWGBBXX_L4_CWHPEI17050269	8645938	3830998	44.30980189772353	44	105	41271.72654709776	0.8528211498760792	2.669755105774625	0.8528211498760792	inf	-inf	186827.573502	0.0	11465.0
FCHHLWGBBXX_L4_CWHPEI17050271	7333561	3166722	43.181232146292906	44	105	125538.87700119123	0.8978911010273041	2.4241875584829344	0.8978911010273041	inf	-inf	190562.14686399998	0.0	11439.0
FCHHLWGBBXX_L4_CWHPEI17050268	8422561	3800587	45.12388809057008	44	105	109446.97809056278	0.8686446501582377	2.7010715829922063	0.8686446501582377	inf	-inf	154118.63683799998	0.0	11752.0
Index_CWHPEI17060017	5252938	3161191	60.17948431906108	86	106	23792.21903797889	0.7161355309501868	20.906716634094664	0.7161355309501868	inf	-inf	18170.69857	0.0	9390.0
Index_CWHPEI17060015	12641770	6671338	52.772183009183045	118	118	30511.583673260466	0.8455745497062974	14.87758700095116	0.8455745497062974	inf	-inf	15707.7678089	0.0	10903.0
Index_CWHPEI17060019	5375103	3082938	57.355886947654774	149	149	58513.90135399641	0.8669930548675067	23.068746999622665	0.8669930548675067	inf	-inf	20567.171726	0.0	8991.0
Index_CWHPEI17060020	5925595	2844366	48.00135682577025	106	106	24348.18540834249	0.7307078414147793	34.56179184239325	0.7307078414147793	inf	-inf	26621.311248	0.0	9092.0
Index_CWHPEI17060014	5693600	3724831	65.42136785162289	128	128	94171.67547986927	0.841116916000746	41.670378498695776	0.841116916000746	inf	-inf	11156.758673	0.0	9163.0
Index_CWHPEI17060016	5448381	2990950	54.896124188084485	117	117	24637.355230678066	0.7745922207549552	18.57625928192301	0.7745922207549552	inf	-inf	27844.568966	0.0	8888.0
FCHHLWGBBXX_L4_CWHPEI17050272	7334055	3298502	44.97514676396619	44	105	145314.59483582713	0.8372026032667413	2.17803062184616	0.8372026032667413	inf	-inf	236364.2467759	0.0	11151.0
Index_CWHPEI17060023	6697811	3714522	55.45874614855511	86	107	29609.62467936217	0.7915287497120647	16.76460345295548	0.7915287497120647	inf	-inf	20872.968305000002	0.0	9545.0
Index_CWHPEI17060021	6336101	3820792	60.30194278784382	107	107	12246.669548754024	0.6662674566937637	21.338763694901328	0.6662674566937637	inf	-inf	20610.306422999998	0.0	9709.0
Index_CWHPEI17060024	6396930	3938384	61.56678281613212	75	106	23492.47721215324	0.7878310343125009	26.72573304925328	0.7878310343125009	inf	-inf	19346.229762999996	0.0	8747.0
Index_CWHPEI17060033	5126152	2947844	57.505981094591036	118	118	89574.91187984454	0.7450118683778527	27.43251394382022	0.7450118683778527	inf	-inf	26680.135285999997	0.0	8530.0
Index_CWHPEI17060032	5548845	3228323	58.18008973038533	139	139	48139.94653949396	0.8232604237414132	33.495559806549814	0.8232604237414132	inf	-inf	17879.959580000002	0.0	9038.0
Index_CWHPEI17060035	4777708	2282941	47.78318390324398	96	106	30204.933693084837	0.7946321469975793	60.57195292452554	0.7946321469975793	inf	-inf	25102.206024	0.0	9197.0
Index_CWHPEI17060038	5533371	3072786	55.531899090084494	170	170	23600.88680145122	0.7212307914459601	16.373053152452925	0.7212307914459601	inf	-inf	32852.64389399999	0.0	8982.0
Index_CWHPEI17060040	5423977	2648210	48.82413771297335	117	117	16980.082745039424	0.7793605762628686	19.978689507071905	0.7793605762628686	inf	-inf	22828.360867999996	0.0	9500.0
Index_CWHPEI17060039	4603530	2264838	49.19785468977068	107	107	13853.195102822485	0.8378509164031336	15.333973370699486	0.8378509164031336	inf	-inf	31098.662781	0.0	9255.0
Index_CWHPEI17060037	4329018	1858968	42.942025189084454	106	106	26115.26018445009	0.8129896820710788	34.9576374508659	0.8129896820710788	inf	-inf	36221.884089	0.0	8882.0
Index_CWHPEI17060041	4699359	2558661	54.44702139164087	127	127	18384.82232342463	0.7498974482228332	29.105157274245745	0.7498974482228332	inf	-inf	25169.46099	0.0	9298.0
Index_CWHPEI17060047	4842497	2566052	52.99026514626648	44	106	55031.84803005209	0.8298006084016419	26.131753008015135	0.8298006084016419	inf	-inf	18773.389547	0.0	9592.0
Index_CWHPEI17060043	6837560	4348251	63.59360649120447	128	128	36795.35830917068	0.8617102548083172	28.40478464677988	0.8617102548083172	inf	-inf	13291.401424	0.0	10564.0
Index_CWHPEI17060042	6020061	3329618	55.308708665908874	106	106	53178.76265308393	0.8012798866685179	38.78685559631613	0.8012798866685179	inf	-inf	18435.129234	0.0	9576.0
Index_CWHPEI17060044	5735205	2539824	44.28479888687501	44	118	32500.395994790684	0.8604663400248979	61.44623888256012	0.8604663400248979	inf	-inf	24469.578626	0.0	9407.0
